# Supplementary material for: Frustrated behavior of Lewis/Brønsted pairs inside molecular cages
Source: Royal Society of Chemistry journal article supplement (doi:10.1039/d2qo00011c), 2022-01-01
Supplement: d2qo00011c1.pdf [file d2qo00011c1.pdf]

## Supporting information

### Frustrated Behavior of Lewis/Brønsted Pairs inside Molecular Cages

C. Li,<sup>a,b</sup> A.-D. Manick,<sup>b</sup> J.-P. Dutasta,<sup>c</sup> X. Bugaut,<sup>b</sup> B. Chatelet,<sup>\*b</sup> and A. Martinez<sup>\*b</sup>

#### Table

|                                 |    |
|---------------------------------|----|
| I/ General method .....         | 2  |
| II/ Experimental section .....  | 3  |
| III / NMR spectra .....         | 6  |
| V / Kinetics experiment.....    | 46 |
| VI/ Mass spectra.....           | 48 |
| VII/ Crystallographic data..... | 54 |

---

## I/ General method

Commercial reagents were used directly as received without further purification. All reactions were performed in oven-dried glassware under a positive pressure of argon, unless otherwise noted. Fritted glass was subsequently neutralized with saturated NaHCO<sub>3</sub> solution, twice rinsed with distilled water and acetone, then oven-dried. Dichloromethane, tetrahydrofuran and toluene were dried prior to use through standard procedures or obtained from a solvent drying System BRAUN MB-SPS800. <sup>1</sup>H and <sup>13</sup>C NMR spectra were recorded on a Bruker AC 400 (400 MHz for <sup>1</sup>H NMR, 101 MHz for <sup>13</sup>C NMR, and 162 MHz for <sup>31</sup>P NMR in CDCl<sub>3</sub> or CD<sub>2</sub>Cl<sub>2</sub>). Chemical shifts were reported in ppm on the  $\delta$  scale relative to residual CDCl<sub>3</sub> ( $\delta = 7.26$  for <sup>1</sup>H NMR and  $\delta = 77.16$  for <sup>13</sup>C NMR), CD<sub>2</sub>Cl<sub>2</sub> ( $\delta = 5.32$  for <sup>1</sup>H NMR and  $\delta = 53.84$  for <sup>13</sup>C NMR) as the internal references. Coupling constant (J) are reported in Hertz unit (Hz). Multiplicities are described with standard following abbreviations: s = singlet, br = broad, d = doublet, t = triplet, q = quadruplet, m = multiplet. Column chromatographies were performed with gel 60 (Macherey-Nagel® Si 60, 0.040-0.063 mm). Analytical thin layer chromatography (TLCs) were carried out on Merck®Kieselgel 60 F254 plates and achieved under a 254 nm UV light. High-resolution mass spectra (HRMS) were performed on a SYNAPT G2 HDMS (Waters) spectrometer equipped with atmospheric pressure ionization source (API) pneumatically assisted.

## II/ Experimental section

### Simplified examples of frustrated pairs.

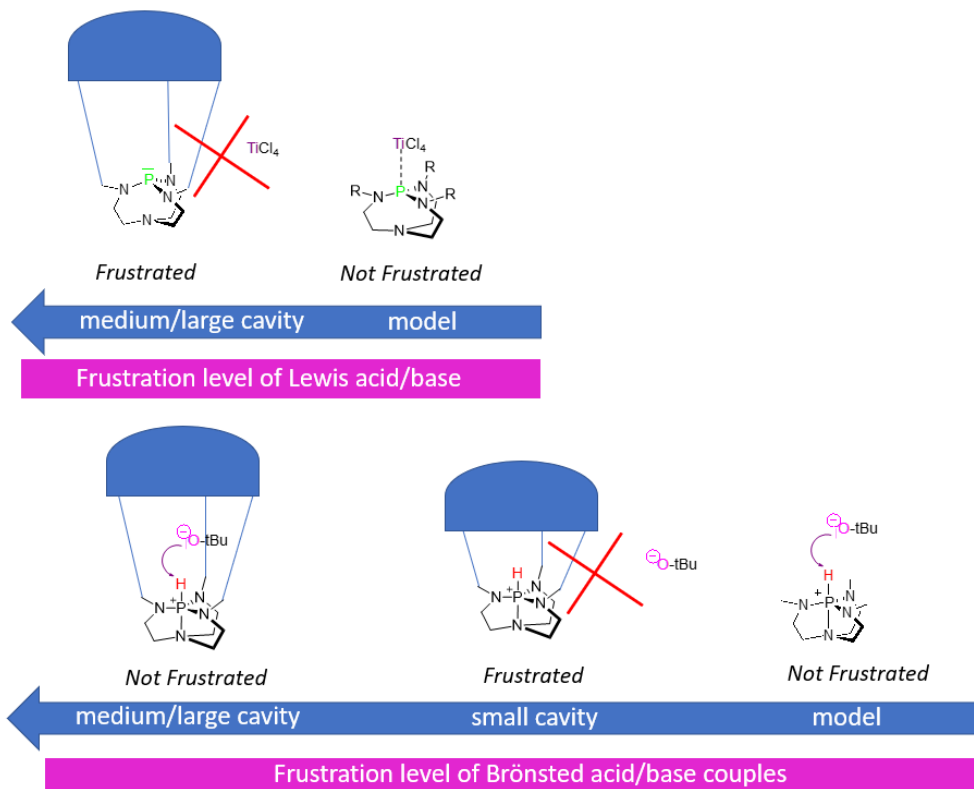

**Scheme S1** : Top: simplified examples of frustrated Lewis behavior involving pro-azaphosphatrane (green: Lewis basic site, purple: Lewis acid site) ; bottom: simplified examples of frustrated Brønsted behavior involving azaphosphatrane (red: Brønsted acid site, pink Brønsted basic site)

### MBH reactions between cyclopentenone ( $n = 1$ ) or cyclohexenone ( $n = 2$ ) and benzaldehyde derivatives.

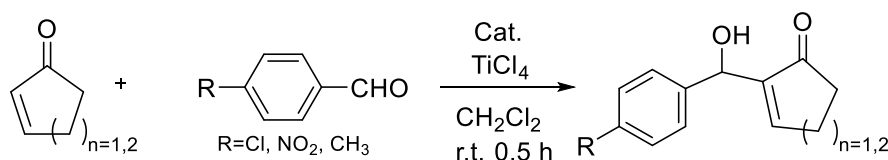

### General procedure.

Para-substituted benzaldehyde (0.3 mmol) was placed in a 5 mL oven-dried Schlenk tube and dissolved in anhydrous dichloromethane (1 mL). 2-Cyclopenten-1-one or 2-cyclohexen-1-one (0.9 mmol) was added and a solution of P@4 (30 mg, 0.03 mmol) in anhydrous dichloromethane (1 mL) was added drop-wise. The mixture was stirred under argon atmosphere at room temperature, and a solution of

titanium chloride in anhydrous dichloromethane (1 M) (0.3 mL, 0.3 mmol) was then added. The mixture was stirred for 0.5 hour and then quenched with a saturated aqueous solution of NaHCO<sub>3</sub> (3.0 mL). The mixture was stirred for an additional 0.5 hour. The inorganic precipitate was filtered and the organic phase was dried over Na<sub>2</sub>SO<sub>4</sub>, filtered, and evaporated under vacuum to give the crude product, which was purified by silica gel column chromatography using petroleum ether/ethyl acetate as eluent to give the pure compound (Table S1).

**Table S1. Experimental details**

| 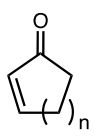 | n = 1                                                                                 |          |                 | n = 2           |          |                 |
|-----------------------------------------------------------------------------------|---------------------------------------------------------------------------------------|----------|-----------------|-----------------|----------|-----------------|
|                                                                                   |  R = | Cl       | CH <sub>3</sub> | NO <sub>2</sub> | Cl       | CH <sub>3</sub> |
| Eluent:<br>petroleum ether:<br>ethyl acetate                                      | 2.5:1                                                                                 | 3:1      | 1:1             | 2:1             | 5:1      | 2:1             |
| Yield % (mg)                                                                      | 74% (47)                                                                              | 51% (30) | 55% (37)        | 71% (50)        | 66% (42) | 86% (63)        |

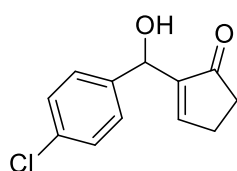

**2-((4-chlorophenyl)(hydroxy)methyl)cyclopent-2-en-1-one:**

4-chlorobenzaldehyde (42 mg, 0.3 mmol)

2-Cyclopenten-1-one (76 μL, 0.9 mmol)

<sup>1</sup>H NMR (400 MHz, CDCl<sub>3</sub>) δ = 7.27-7.22 (m, 4H), 7.20 (td, *J* = 1.3 Hz, 2.6 Hz, 1H), 5.43 (s, 1H), 3.63 (br s, 1H), 2.54-2.48 (m, 2H), 2.36 (dd, *J* = 2.0 Hz, 6.75 Hz, 2H).

<sup>13</sup>C NMR (101 MHz, CDCl<sub>3</sub>) δ = 209.6, 159.6, 147.6, 140.0, 133.6, 128.7, 127.8, 69.2, 35.3, 26.8.

These data are consistent with literature.<sup>1</sup>

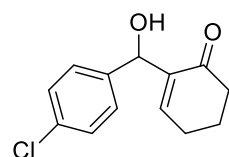

**2-((4-chlorophenyl)(hydroxy)methyl)cyclohex-2-en-1-one:**

4-chlorobenzaldehyde (42 mg, 0.3 mmol)

2-Cyclohexen-1-one (91 μL, 0.9 mmol)

<sup>1</sup>H NMR (400 MHz, CDCl<sub>3</sub>) δ = 7.32-7.20 (m, 4H), 6.72 (t, *J* = 4.3 Hz, 1H), 5.48 (s, 1H), 3.48 (br s, 1H), 2.40 (dd, *J* = 5.8 Hz, 7.1 Hz, 2H), 2.36 (dd, *J* = 4.3 Hz, 10.3 Hz, 2H), 1.96 (quintuplet, *J* = 6.1 Hz, 2H).

<sup>13</sup>C NMR (101 MHz, CDCl<sub>3</sub>) δ = 200.3, 147.5, 140.9, 140.5, 133.3, 128.5, 127.9, 72.0, 38.6, 25.9, 22.6.

These data are consistent with literature.<sup>1</sup>

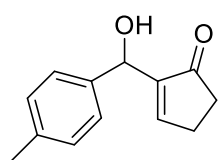**2-(hydroxy(p-tolyl)methyl)cyclopent-2-en-1-one:**4-methylbenzaldehyde (36  $\mu$ L, 0.3 mmol)2-cyclopenten-1-one (75  $\mu$ L, 0.9 mmol) $^1\text{H NMR}$  (300 MHz,  $\text{CDCl}_3$ )  $\delta$  = 7.35 – 7.22 (m, 3H), 7.22 – 7.08 (m, 2H), 5.53

(s, 1H), 3.43 (br s, 1H), 2.62-2.55 (m, 2H), 2.48 – 2.43 (m, 2H), 2.35 (s, 3H).

 $^{13}\text{C NMR}$  (75 MHz,  $\text{CDCl}_3$ )  $\delta$  = 209.7, 159.3, 147.9, 138.6, 137.7, 129.3, 126.4, 69.9, 35.4, 26.7, 21.2.These data are consistent with literature.<sup>1</sup>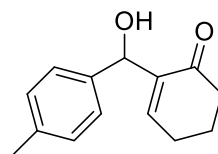**2-(hydroxy(p-tolyl)methyl)cyclohex-2-en-1-one:**4-methylbenzaldehyde (36  $\mu$ L, 0.3 mmol)2-cyclohexen-1-one (91  $\mu$ L, 0.9 mmol) $^1\text{H NMR}$  (400 MHz,  $\text{CDCl}_3$ )  $\delta$  = 7.24 (d,  $J$  = 8.1 Hz, 2H), 7.15 (d,  $J$  = 8.4 Hz, 2H),6.75 (td,  $J$  = 1.1 Hz, 4.2 Hz, 1H), 5.53 (d,  $J$  = 3.6 Hz, 1H), 3.36 (d,  $J$  = 5.3 Hz,1H), 2.45 (dd,  $J$  = 6.3 Hz, 8.1 Hz, 2H), 2.42-2.36 (m, 2H), 2.34 (s, 3H), 1.99 (quintuplet,  $J$  = 5.9 Hz, 2H). $^{13}\text{C NMR}$  (101 MHz,  $\text{CDCl}_3$ )  $\delta$  = 200.6, 147.3, 141.3, 138.9, 137.3, 129.2, 126.5, 72.6, 38.8, 25.9, 22.7, 21.3.These data are consistent with literature.<sup>1</sup>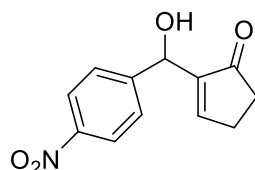**2-(hydroxy(4-nitrophenyl)methyl)cyclopent-2-en-1-one:**

4-nitrobenzaldehyde (45 mg, 0.3 mmol)

2-cyclopenten-1-one (76  $\mu$ L, 0.9 mmol) $^1\text{H NMR}$  (300 MHz,  $\text{CDCl}_3$ )  $\delta$  = 8.21 (dt,  $J$  = 3.1 Hz, 8.8 Hz, 2H), 7.58 (dt,  $J$  = 2.3 Hz, 9.6 Hz, 2H), 7.29 (td,  $J$  = 1.2 Hz, 2.7 Hz, 1H), 5.67 (s, 1H), 3.61 (br s, 1H), 2.67-2.59 (m, 2H), 2.52 – 2.45 (m, 2H). $^{13}\text{C NMR}$  (75 MHz,  $\text{CDCl}_3$ )  $\delta$  = 209.4, 159.9, 148.6, 146.8, 127.2, 123.9, 69.2, 35.3, 26.9.These data are consistent with literature.<sup>1</sup>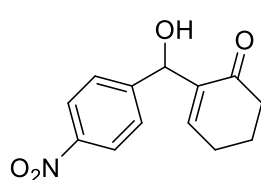**2-(hydroxy(4-nitrophenyl)methyl)cyclohex-2-en-1-one:**

4-nitrobenzaldehyde (45 mg, 0.3 mmol)

2-cyclohexen-1-one (87  $\mu$ L, 0.9 mmol) $^1\text{H NMR}$  (300 MHz,  $\text{CDCl}_3$ )  $\delta$  = 8.17 (dt,  $J$  = 2.4 Hz, 8.8 Hz, 2H), 7.54 (dtd,  $J$  = 0.6 Hz, 2.2 Hz, 9.2 Hz, 2H), 6.82 (td,  $J$  = 1.0 Hz, 4.2 Hz, 1H), 5.60 (d,  $J$  = 5.2 Hz, 1H), 3.58 (d,  $J$  = 5.9 Hz, 1H), 2.49 – 2.38 (m, 4H), 2.00 (quintuplet,  $J$  = 6.1 Hz, 2H). $^{13}\text{C NMR}$  (75 MHz,  $\text{CDCl}_3$ )  $\delta$  = 200.2, 149.5, 148.2, 147.4, 140.4, 127.3, 123.6, 72.1, 38.5, 25.9, 22.5.These data are consistent with literature.<sup>1</sup>

<sup>1</sup> J. Yang, B. Chatelet, V. Dufaud, D. Herault, S. Michaud-Chevallier, V. Robert, J.-P. Dutasta, A. Martinez, *Angew. Chem. Inter. Ed.*, 2018, **57**, 4212-14215

### III / NMR spectra

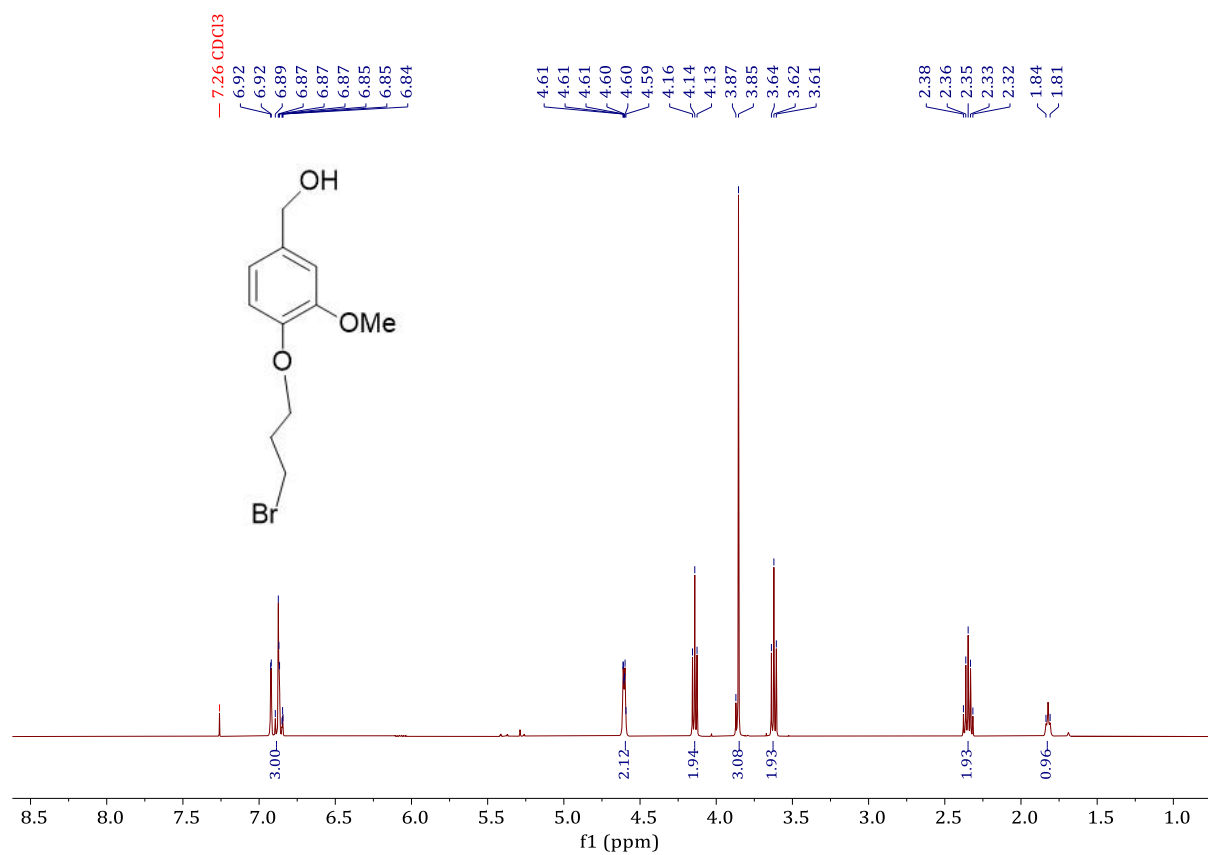

**Figure S1**  $^1\text{H}$  NMR (400 MHz,  $\text{CDCl}_3$ ) spectrum of **8**

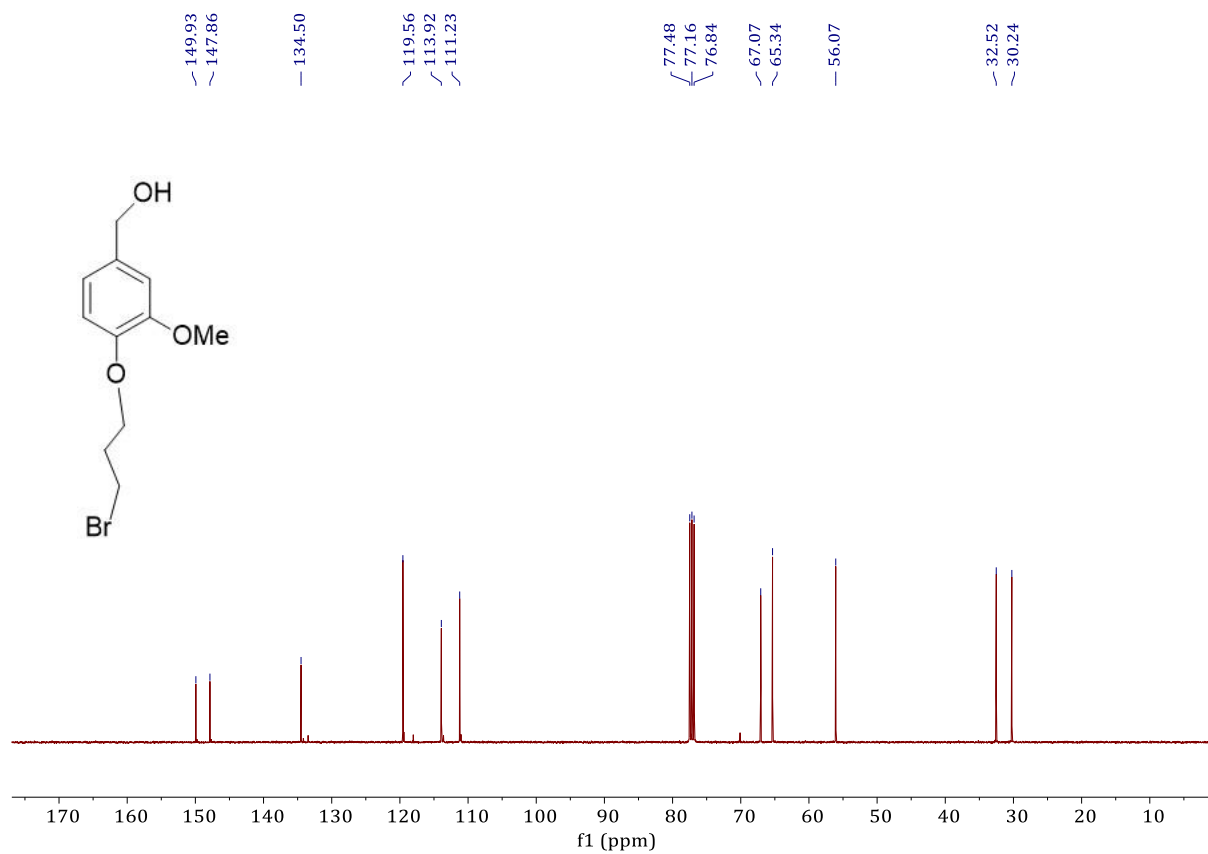

**Figure S2**  $^{13}\text{C}$  NMR (101 MHz,  $\text{CDCl}_3$ ) spectrum of **8**

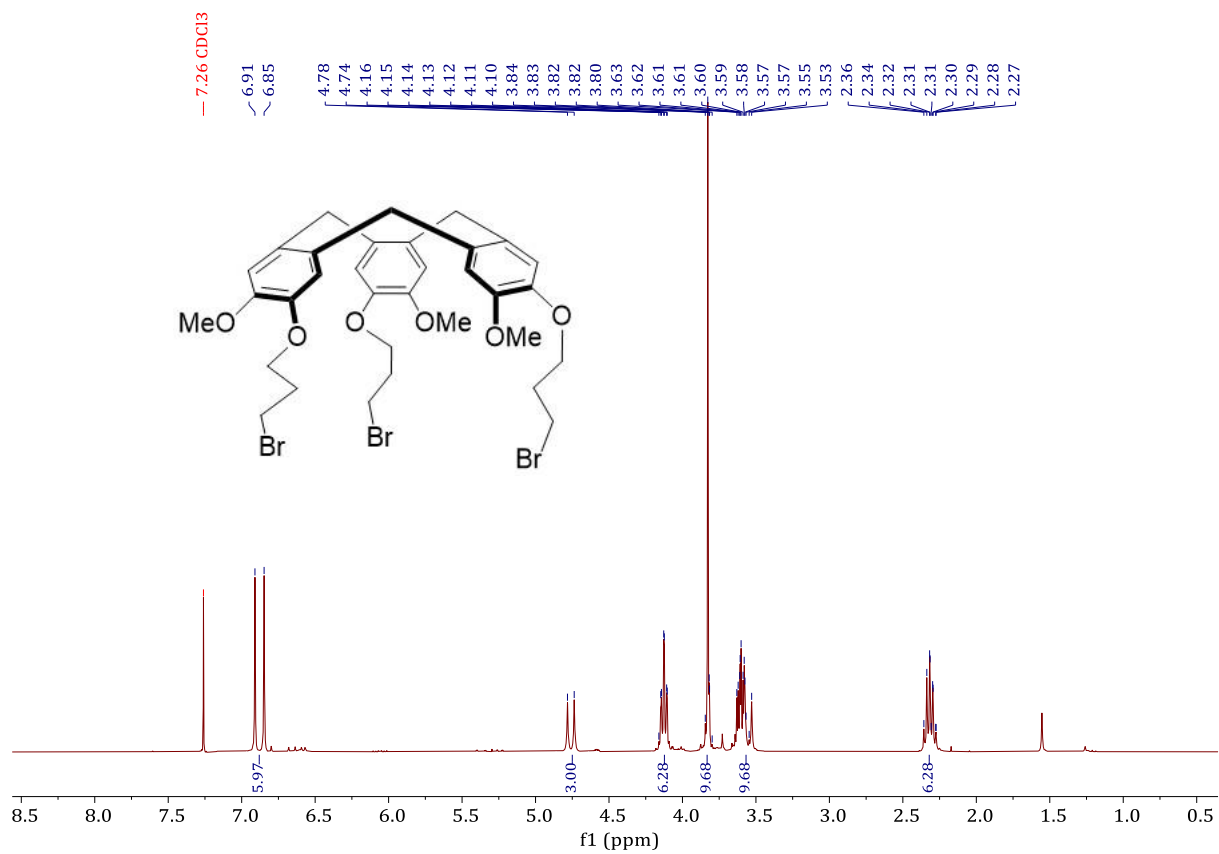

**Figure S3**  $^1\text{H}$  NMR (300 MHz,  $\text{CDCl}_3$ ) spectrum of **9**



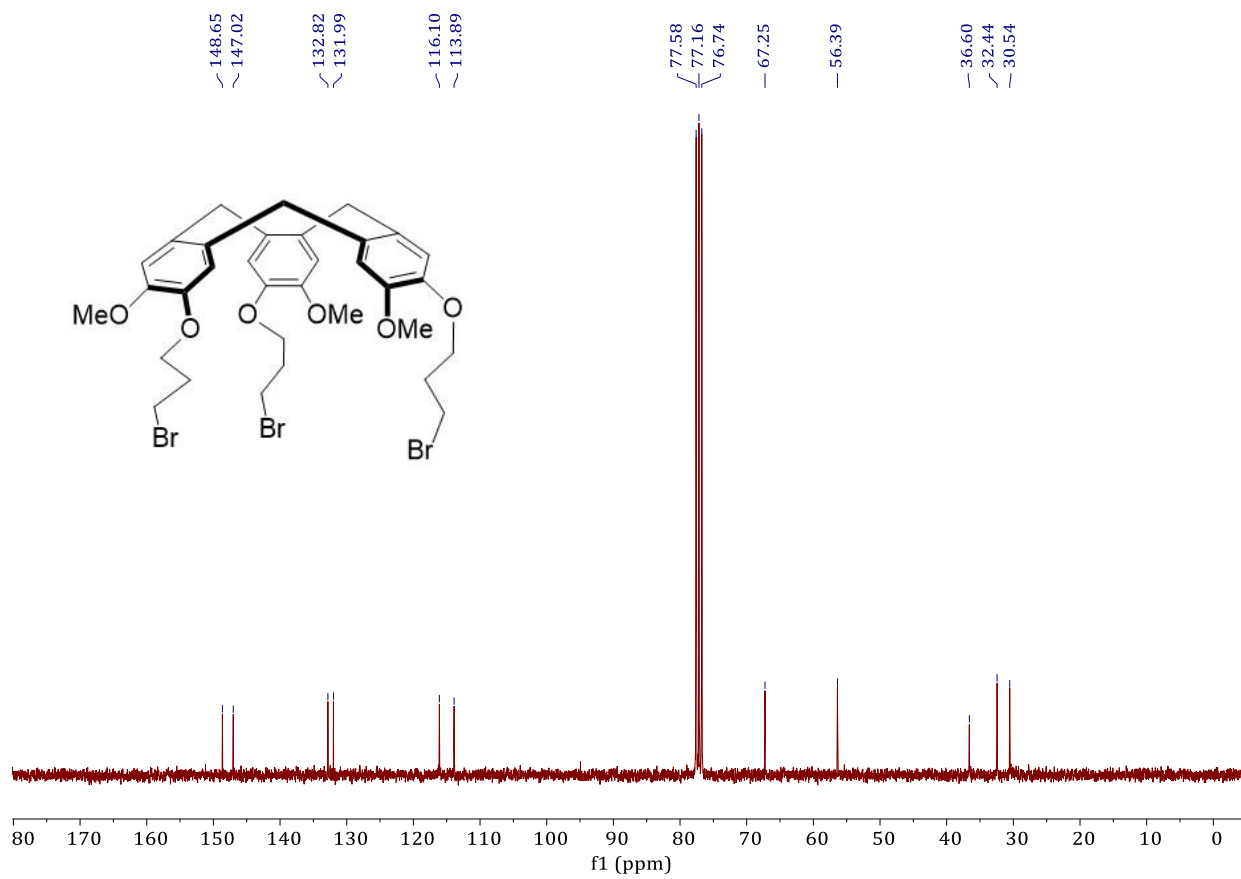

**Figure S4**  $^{13}\text{C}$  NMR (75 MHz,  $\text{CDCl}_3$ ) spectrum of **9**

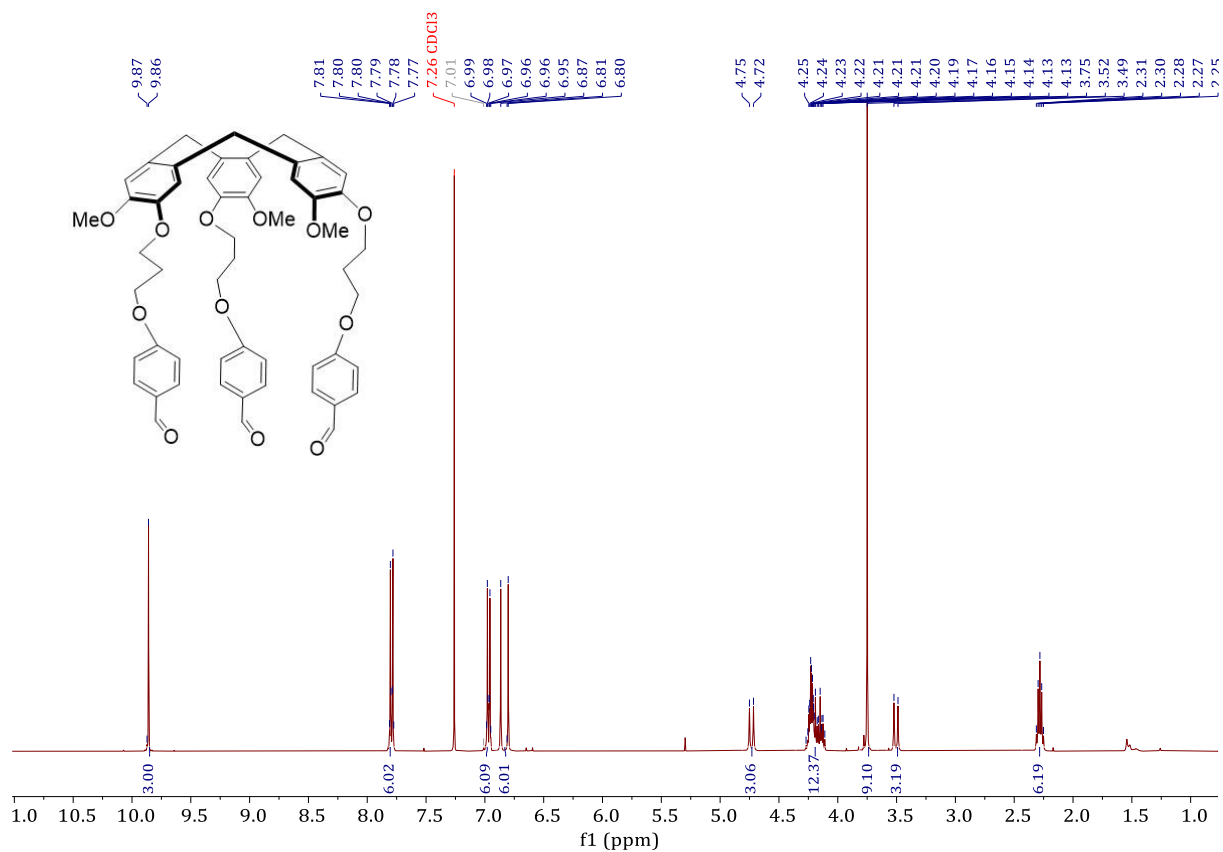

**Figure S5**  $^1\text{H}$  NMR (300 MHz,  $\text{CDCl}_3$ ) spectrum of **7**

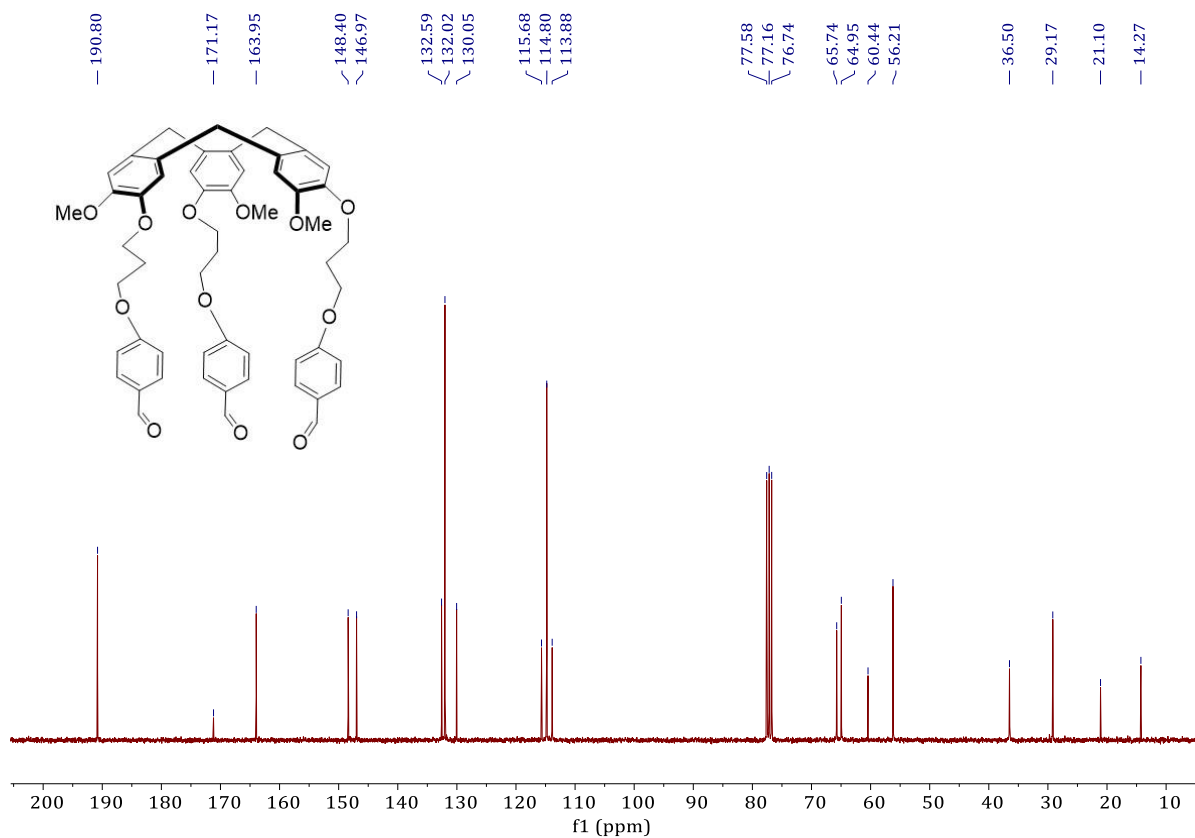

**Figure S6** <sup>13</sup>C NMR (75 MHz, CDCl<sub>3</sub>) spectrum of **7**

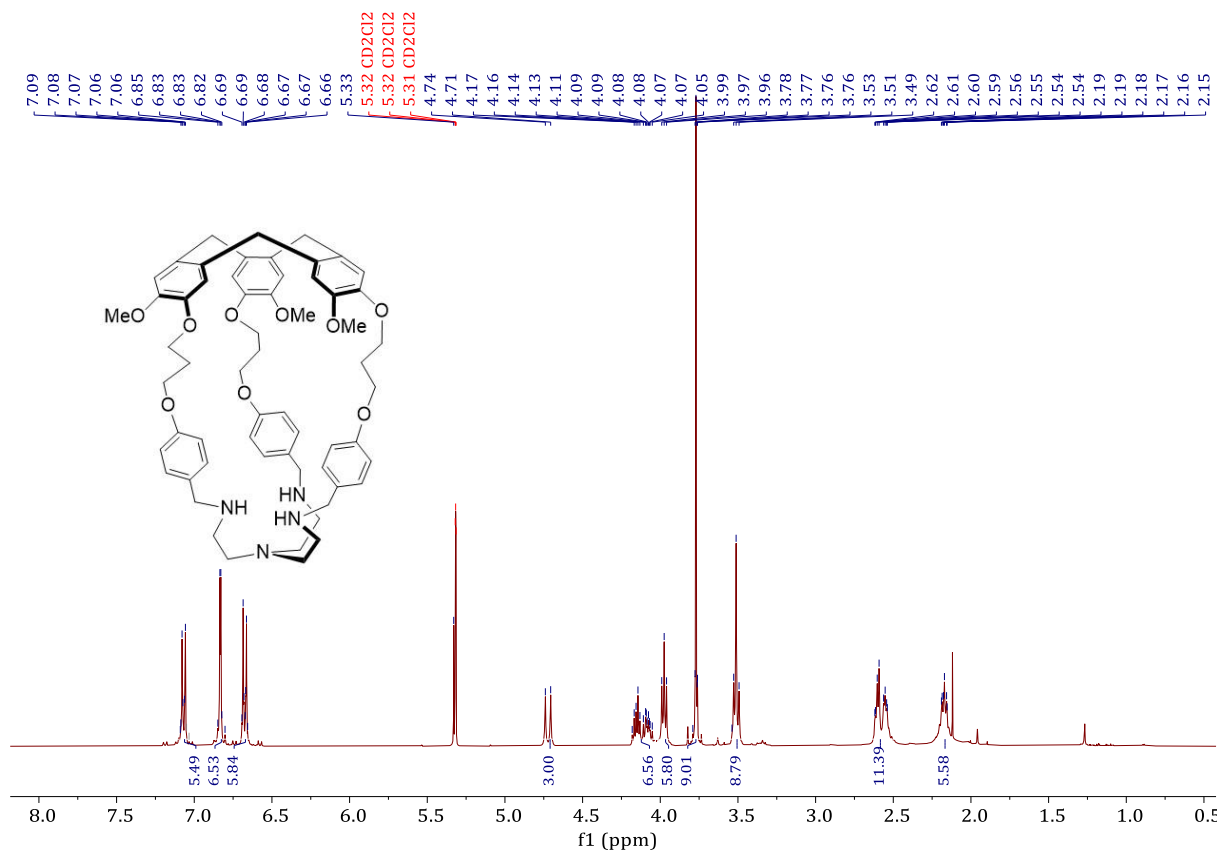

**Figure S7**  $^1\text{H}$  NMR (400 MHz,  $\text{CD}_2\text{Cl}_2$ ) spectrum of hemicryptophane **4**

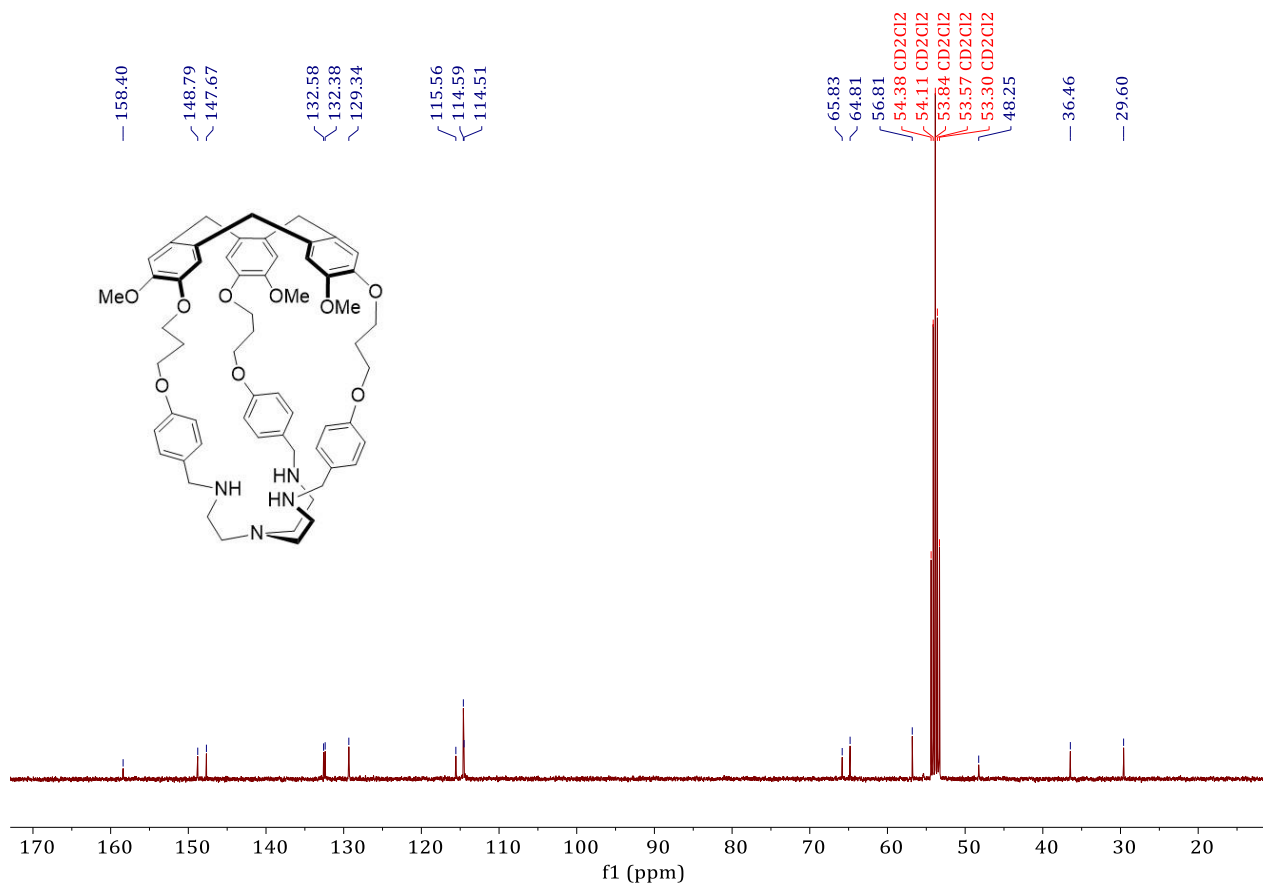

**Figure S8**  $^{13}\text{C}$  NMR (101 MHz,  $\text{CD}_2\text{Cl}_2$ ) spectrum of hemicryptophane **4**

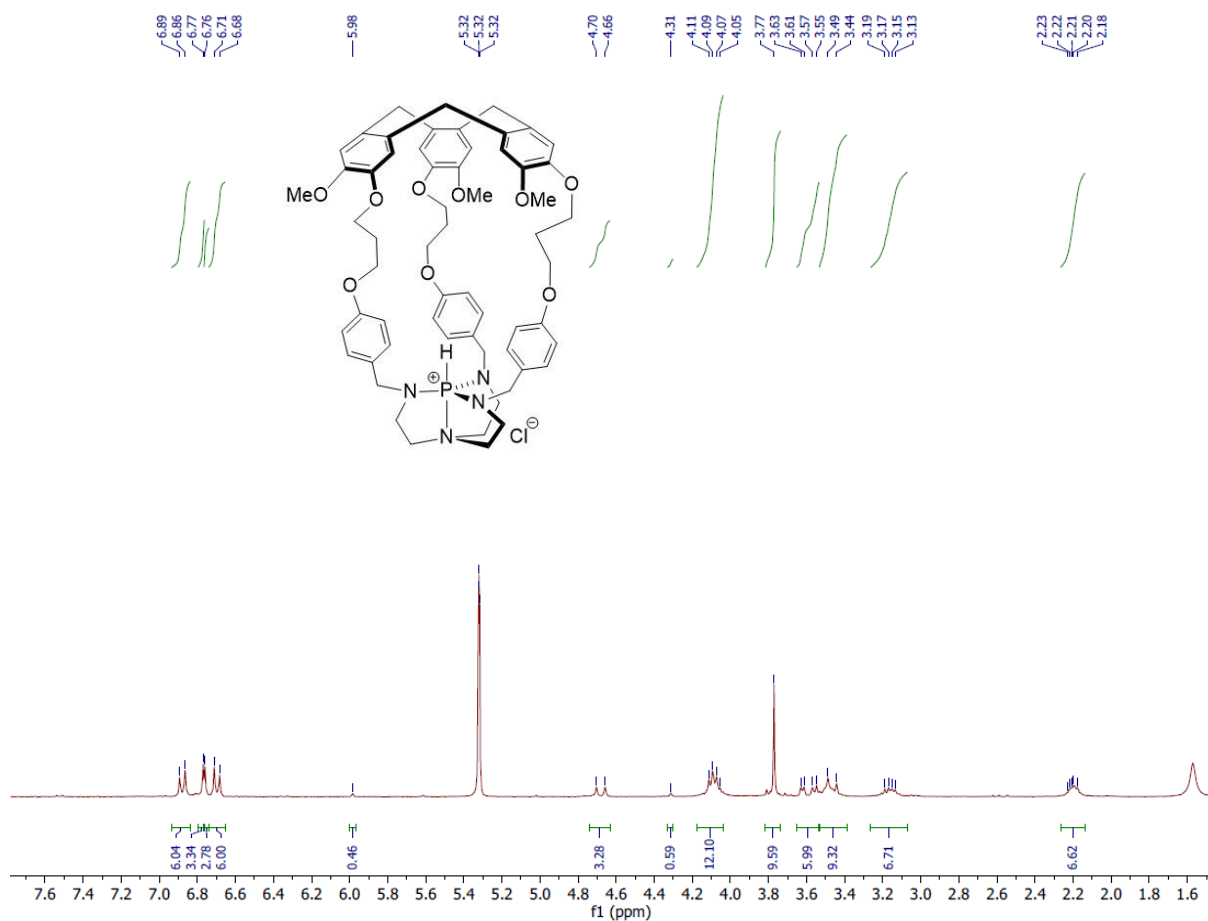

**Figure S9** <sup>1</sup>H NMR (300 MHz, CD<sub>2</sub>Cl<sub>2</sub>) spectrum of P-H<sup>+</sup>@4

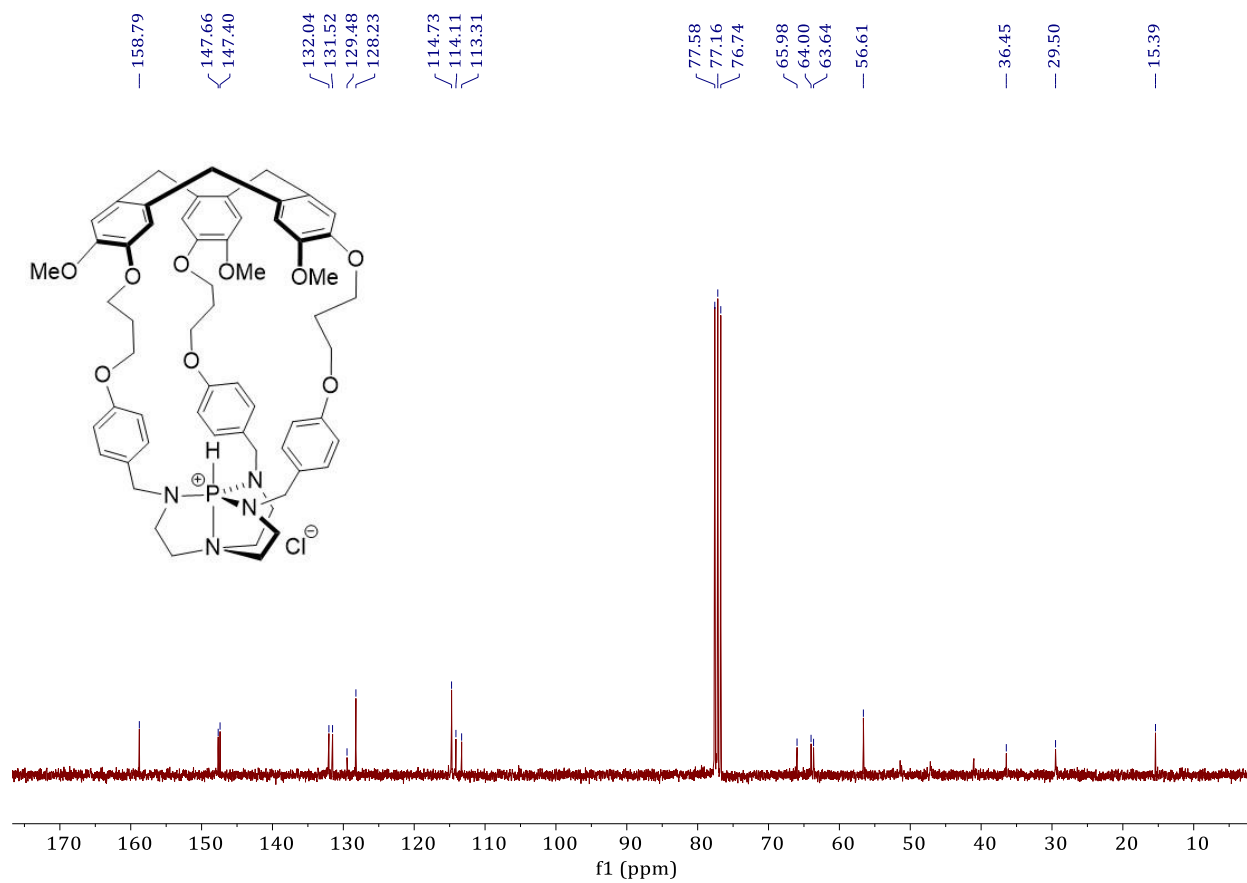

**Figure S10** <sup>13</sup>C NMR (75 MHz, CDCl<sub>3</sub>) spectrum of P-H<sup>+</sup>@4

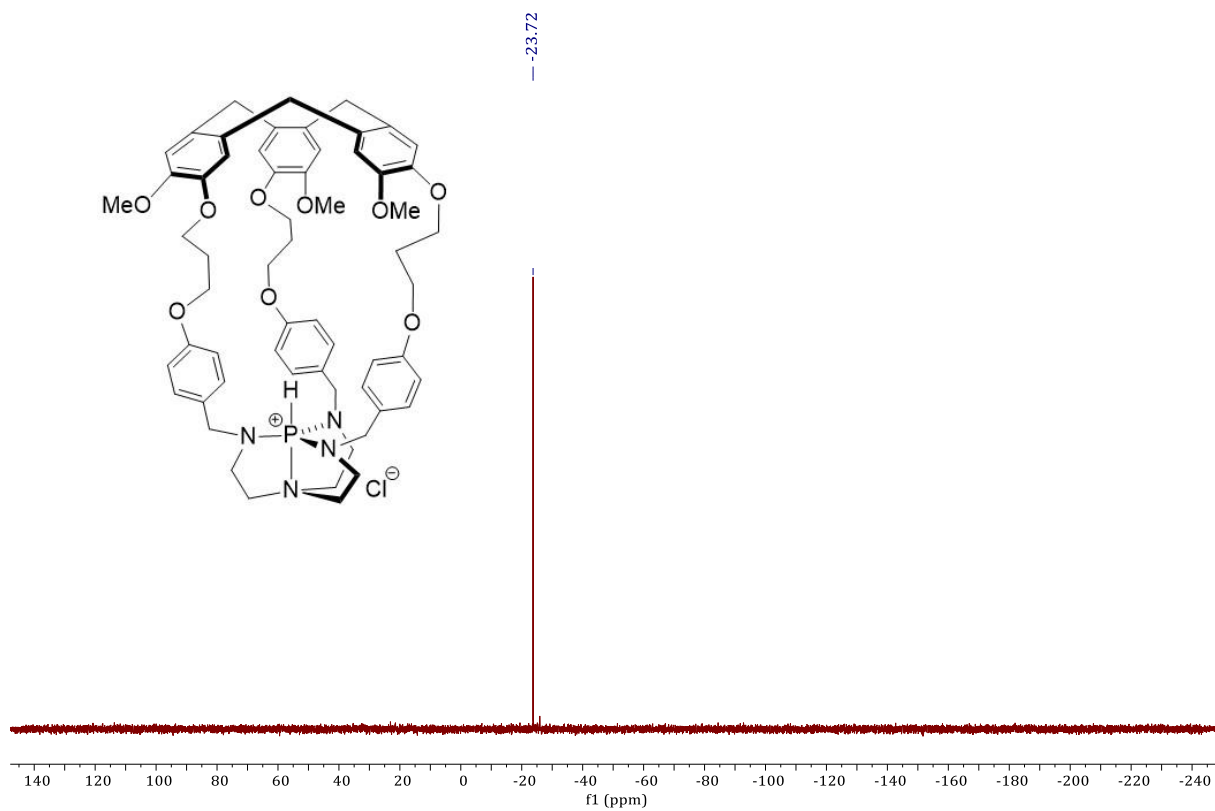

**Figure S11** <sup>31</sup>P CPD NMR (162 MHz, CDCl<sub>3</sub>) spectrum of PH<sup>+</sup>@4



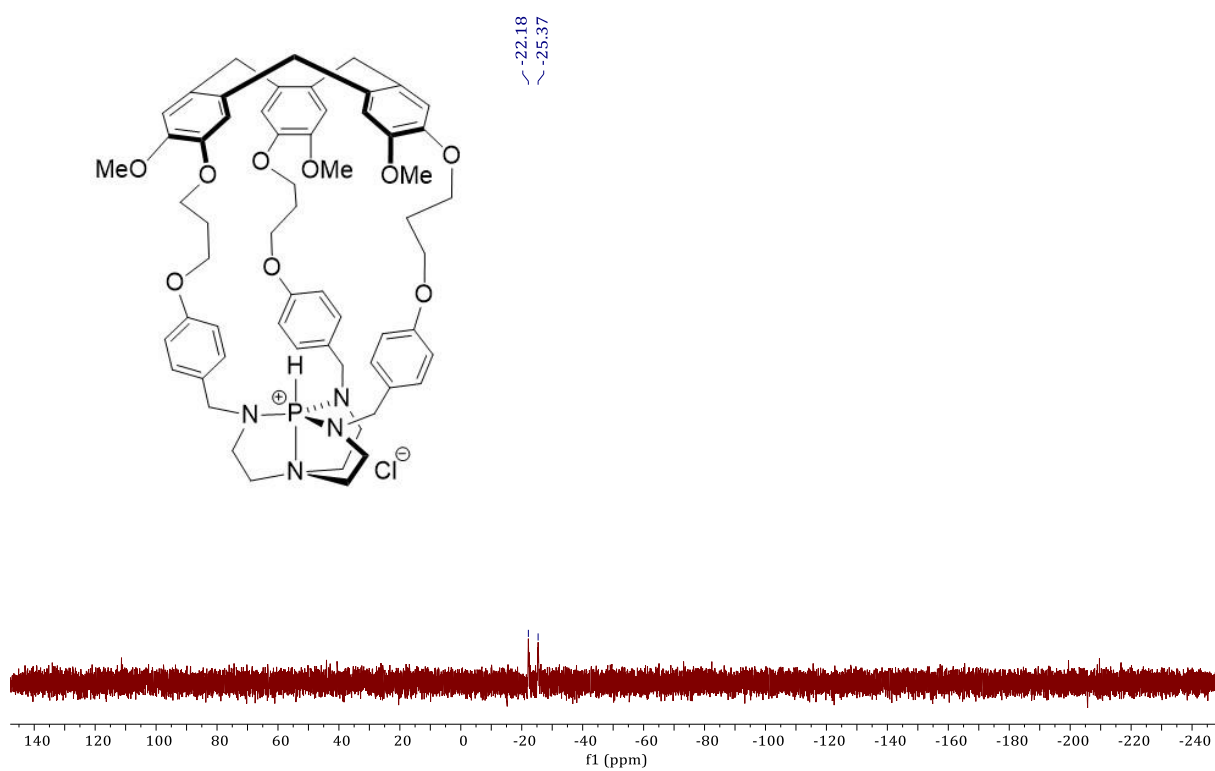

**Figure S12** <sup>31</sup>P NMR (162 MHz, CDCl<sub>3</sub>) spectrum of PH<sup>+</sup>@4

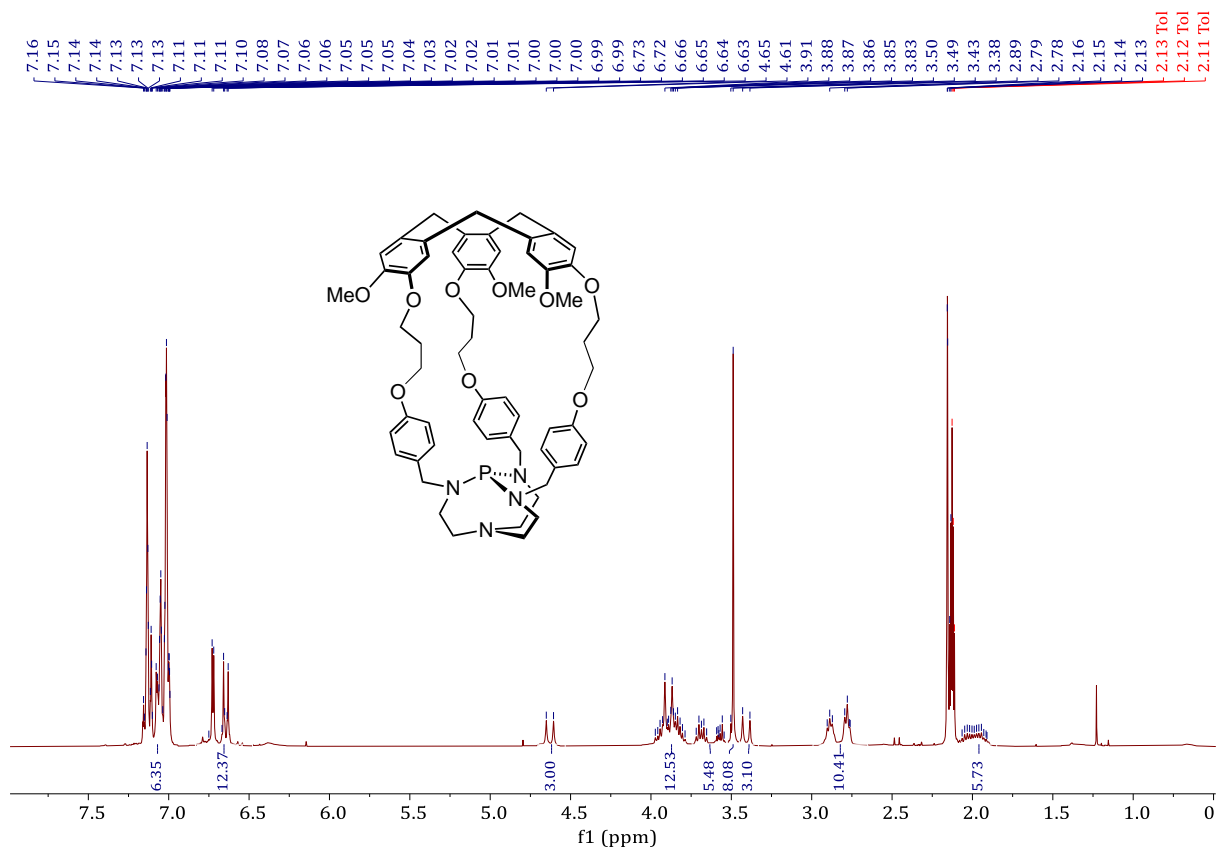

**Figure S13**  $^1\text{H}$  NMR (162 MHz, Toluene- $d_8$ ) spectrum of hemicryptophane P@4

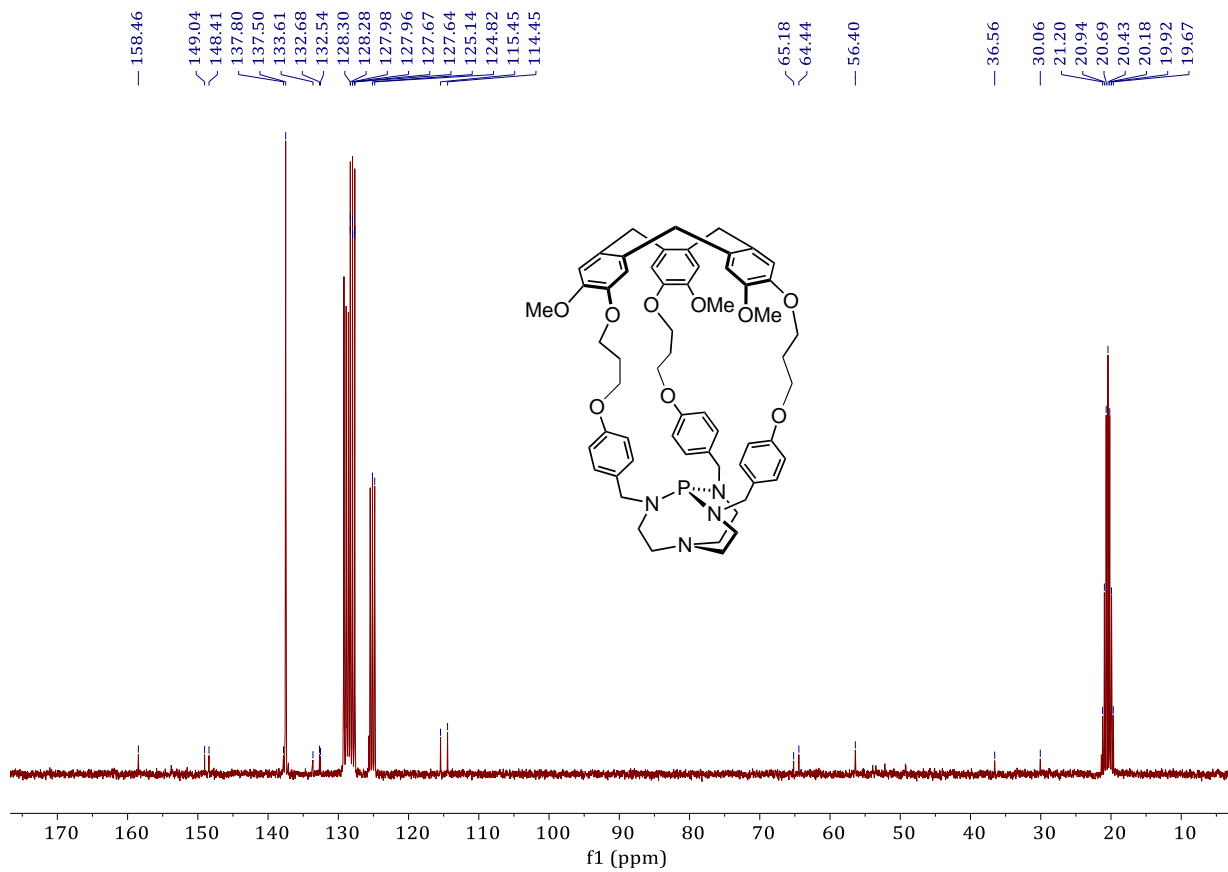

**Figure S14** <sup>13</sup>C NMR (101 MHz, toluene-*d*<sub>8</sub>) spectrum of hemicryptophane P@4

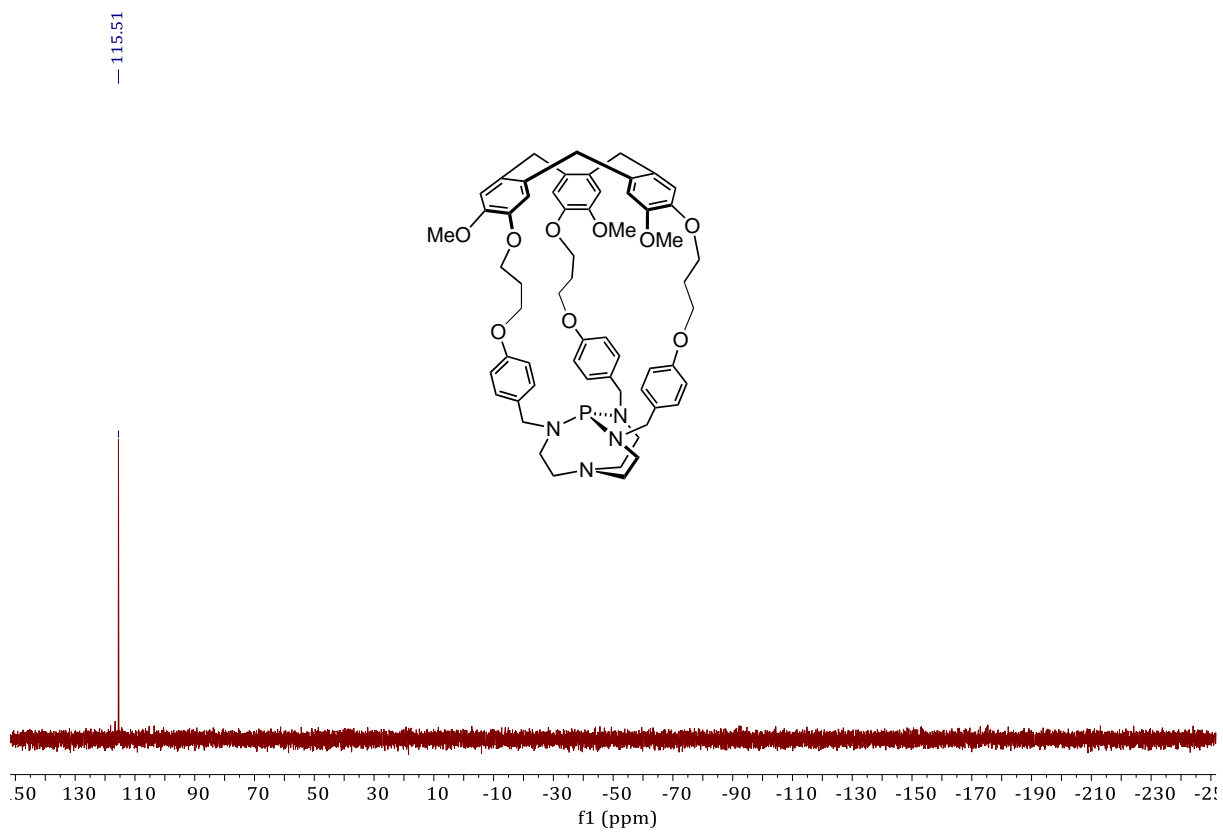

**Figure S15**  $^{31}\text{P}$  CPD NMR (121 MHz, toluene- $d_8$ ) spectrum of P@4

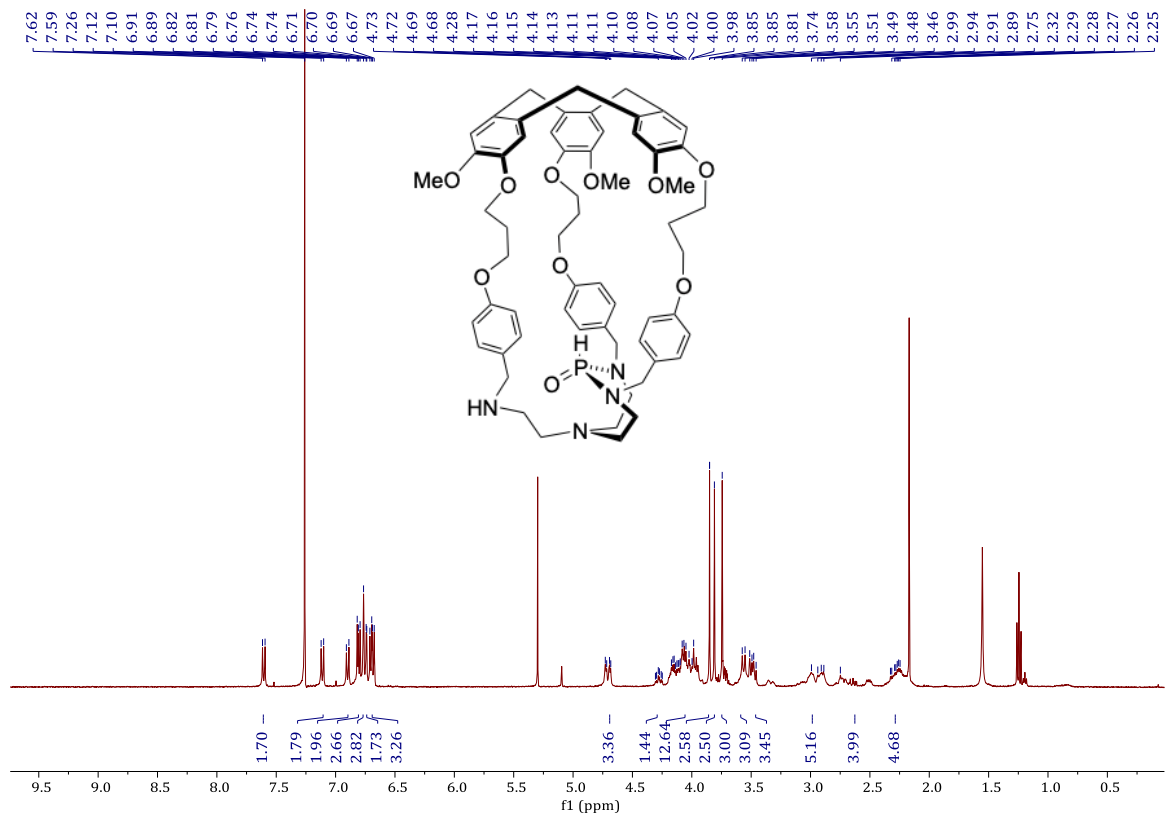

**Figure S16**  $^1\text{H}$  NMR (400 MHz,  $\text{CDCl}_3$ ) spectrum of **13**

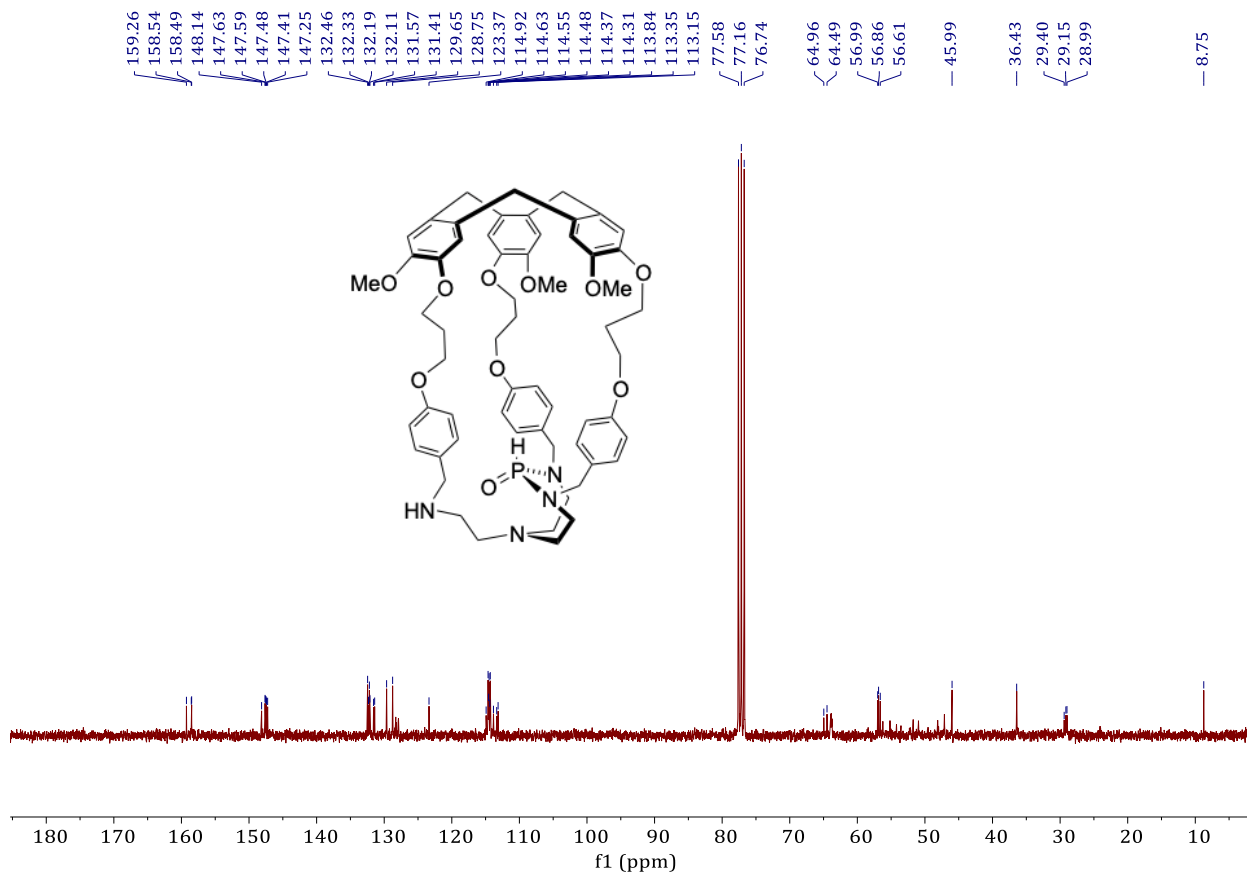

**Figure S17** <sup>13</sup>C NMR (100 MHz, CDCl<sub>3</sub>) spectrum of **13**

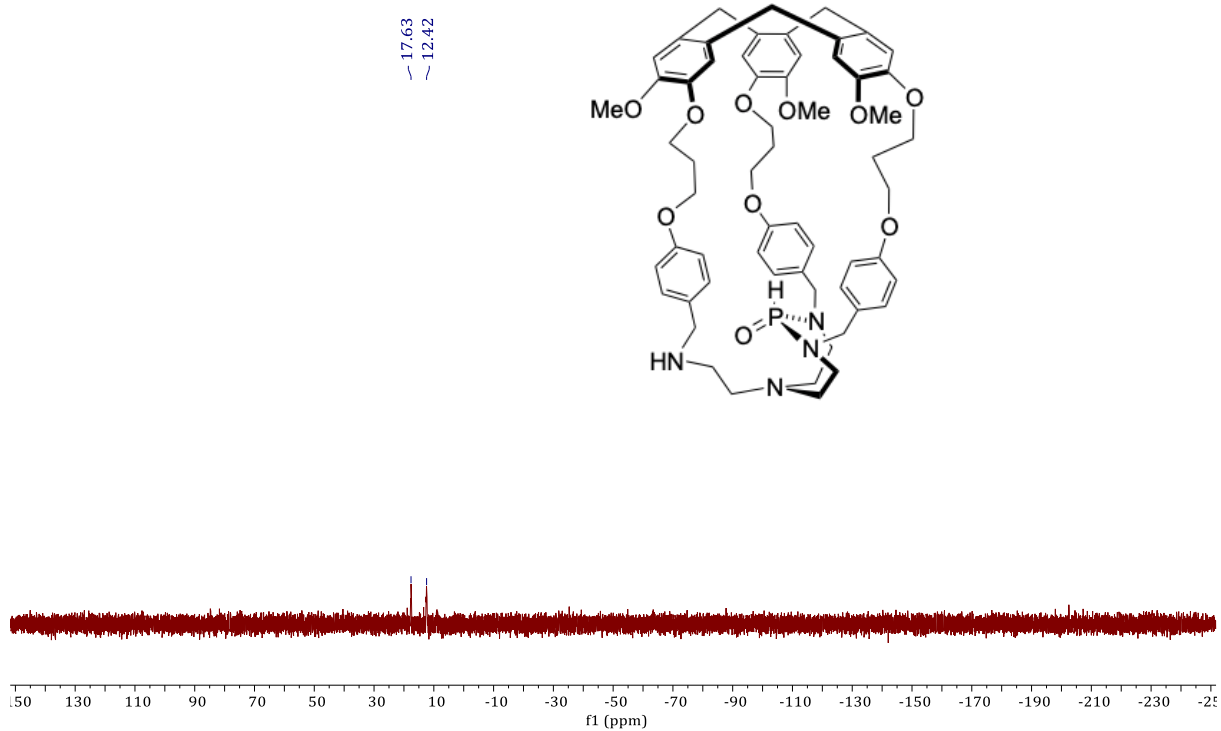

**Figure S18**  $^{31}\text{P}$  NMR (162 MHz,  $\text{CDCl}_3$ ) spectrum of **13**

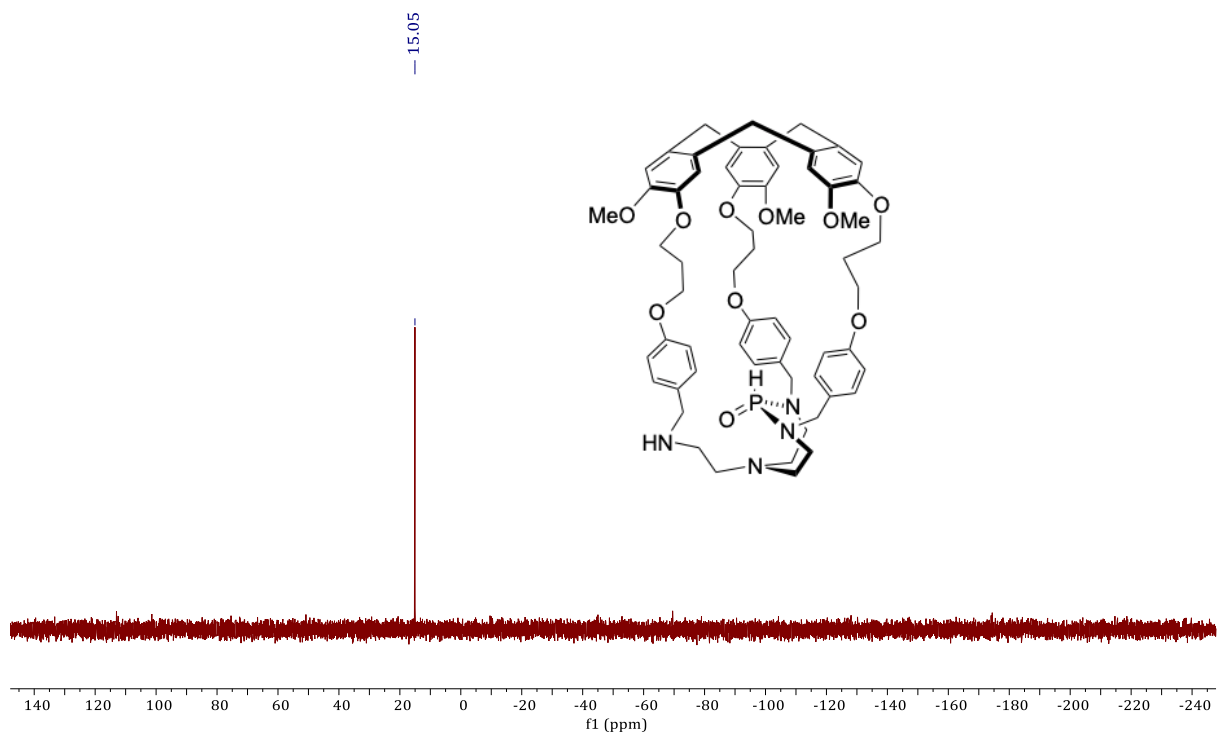

**Figure S19**  $^{31}\text{P}$  CPD NMR (162 MHz,  $\text{CDCl}_3$ ) spectrum of **13**

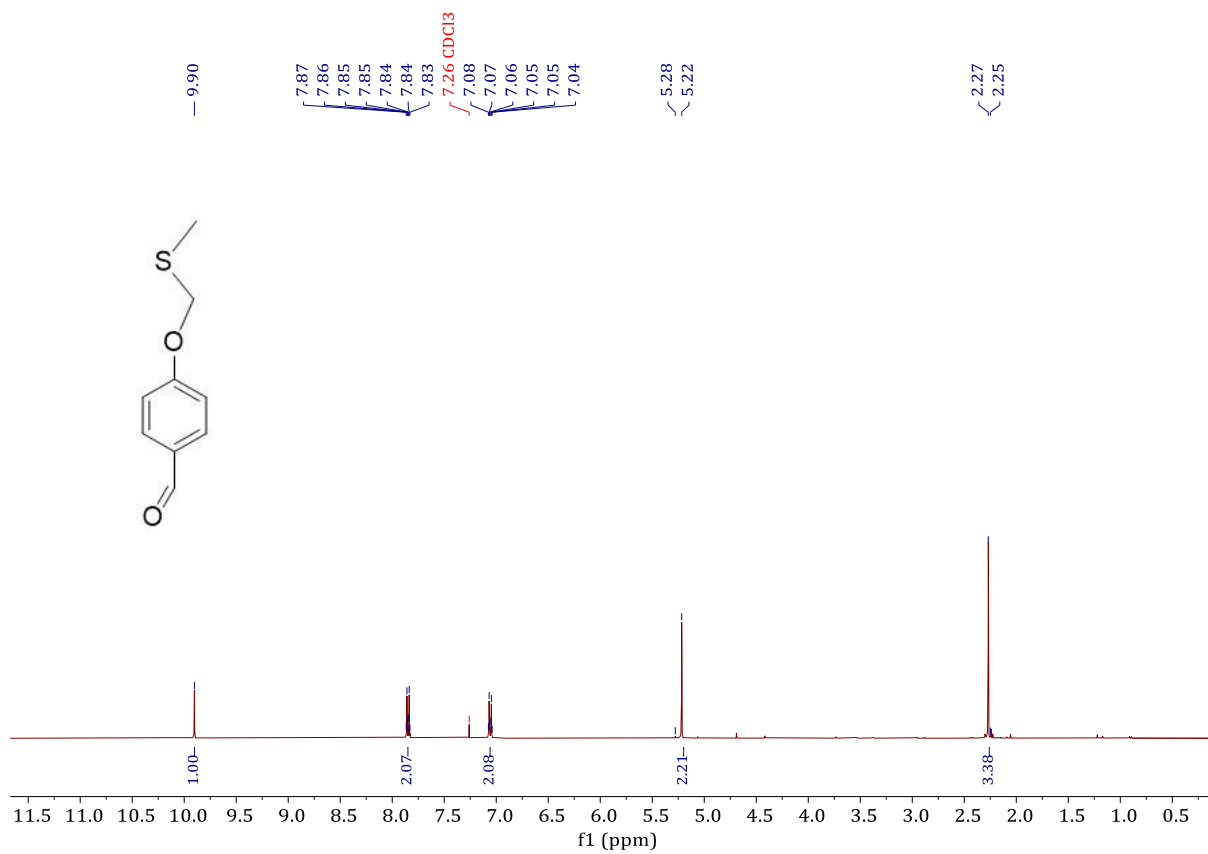

**Figure S20**  $^1\text{H}$  NMR (400 MHz,  $\text{CDCl}_3$ ) spectrum of **10**



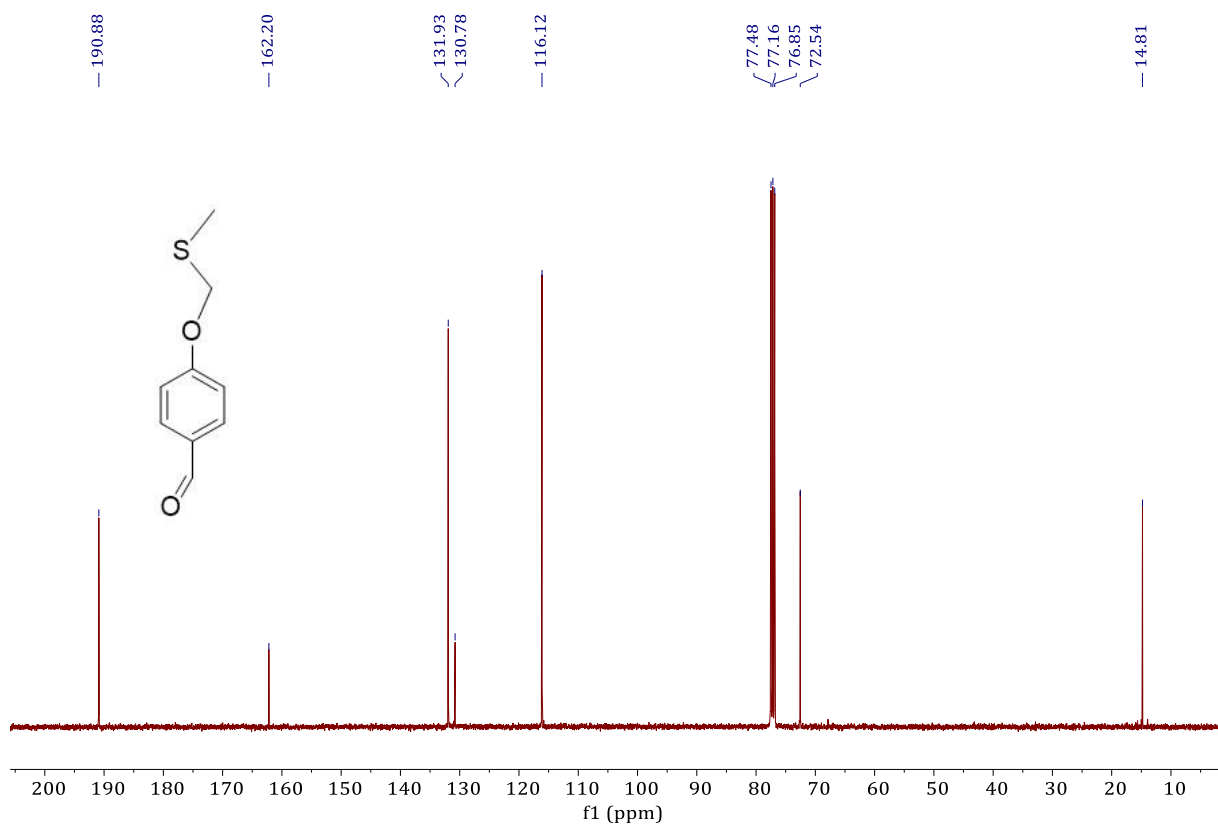

**Figure S21**  $^{13}\text{C}$  NMR (101 MHz,  $\text{CDCl}_3$ ) spectrum of **10**

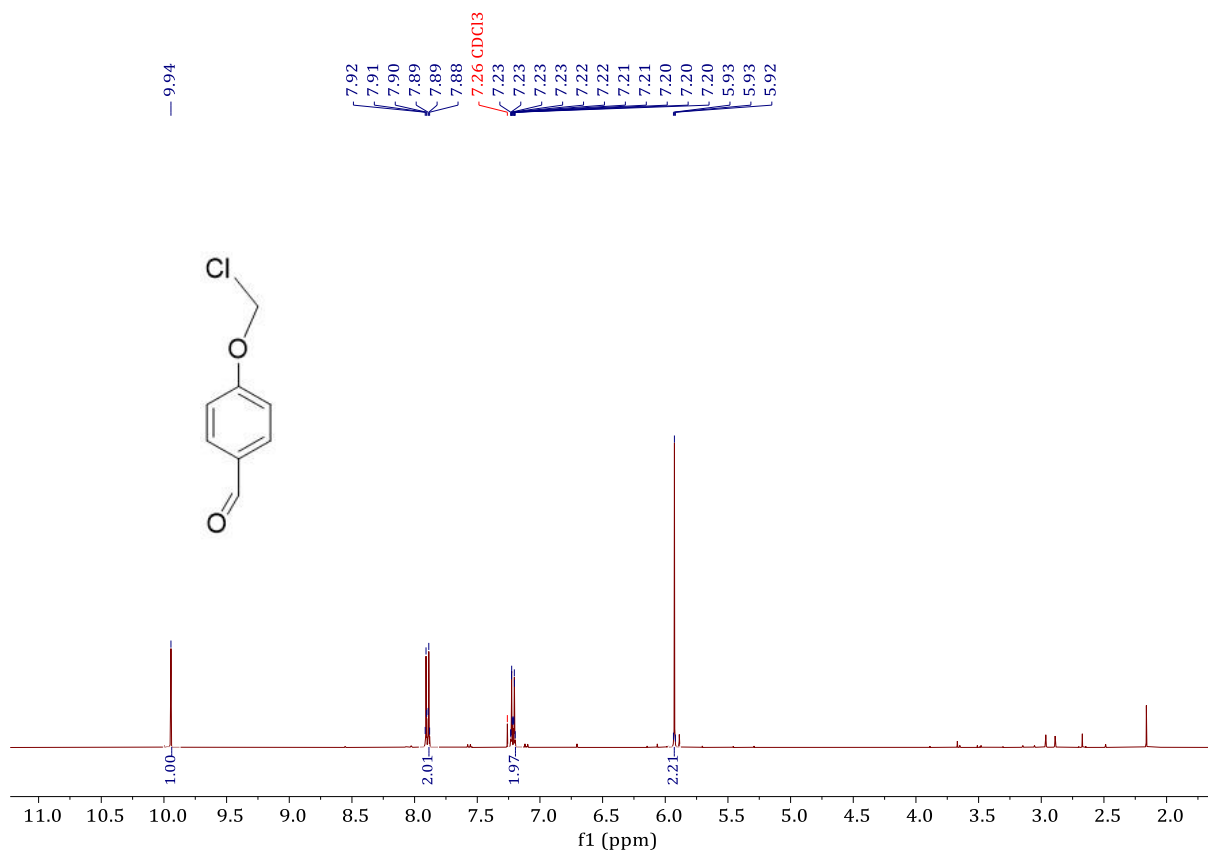

**Figure S22**  $^1\text{H}$  NMR (400 MHz,  $\text{CDCl}_3$ ) spectrum of **11**

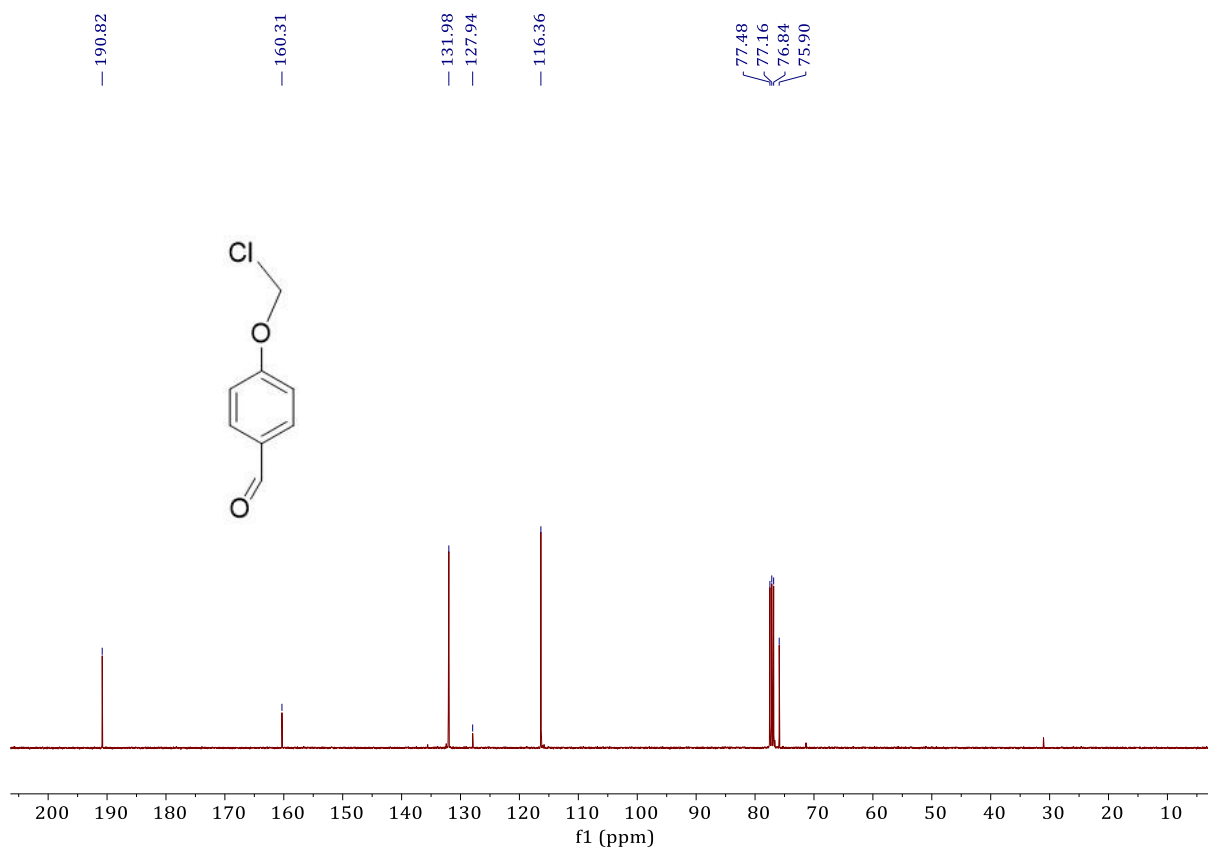

**Figure S23**  $^{13}\text{C}$  NMR (101 MHz,  $\text{CDCl}_3$ ) spectrum of **11**

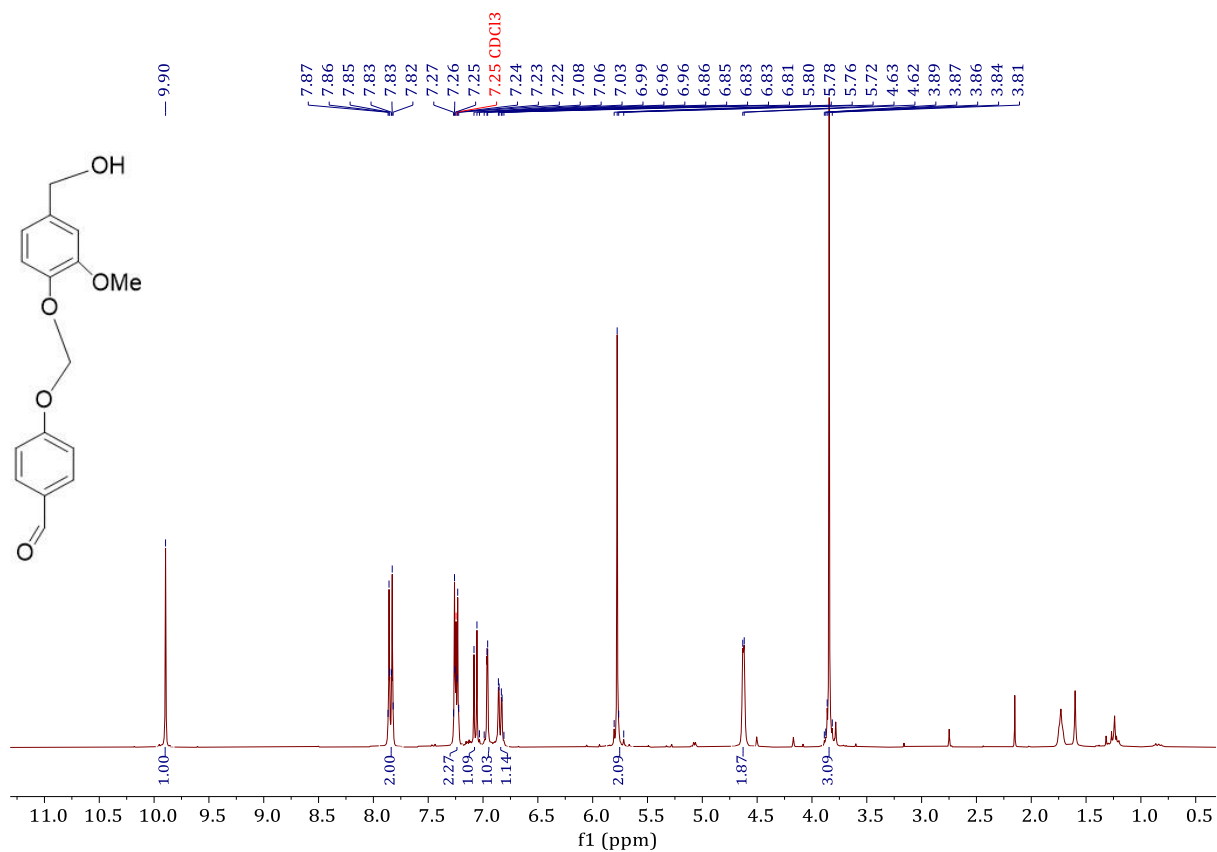

Figure S24  $^1\text{H}$  NMR (300 MHz,  $\text{CDCl}_3$ ) spectrum of 12

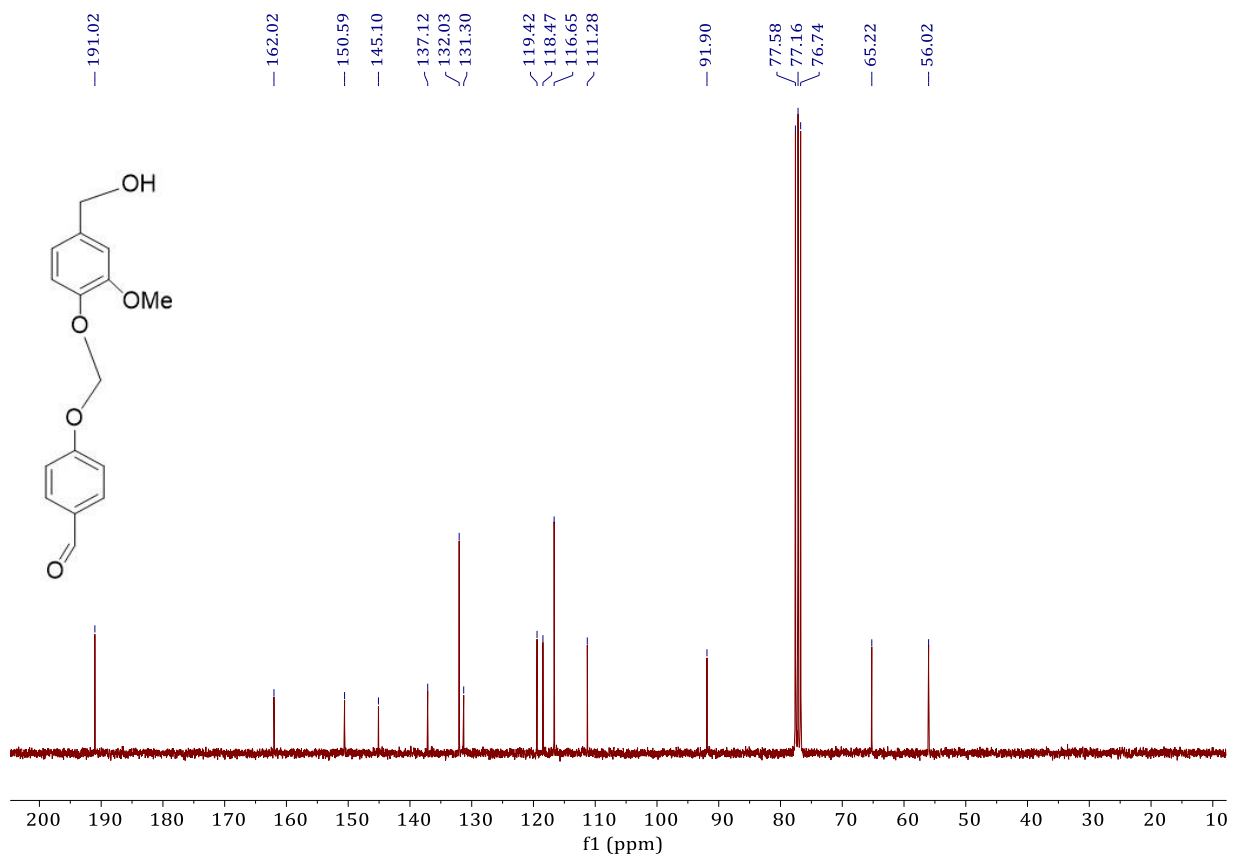

**Figure S25**  $^{13}\text{C}$  NMR (75 MHz,  $\text{CDCl}_3$ ) spectrum of **12**

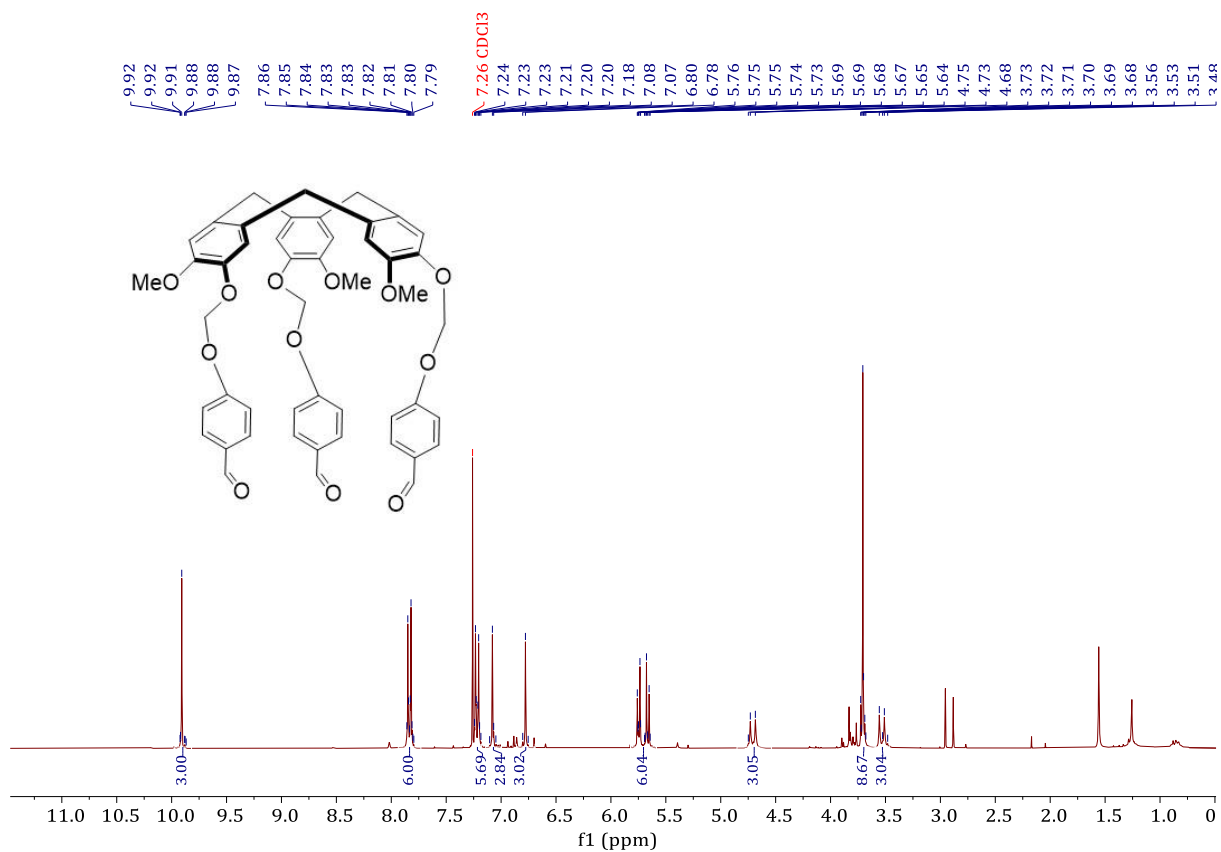

Figure S26 <sup>1</sup>H NMR (300 MHz, CDCl<sub>3</sub>) spectrum of **5**

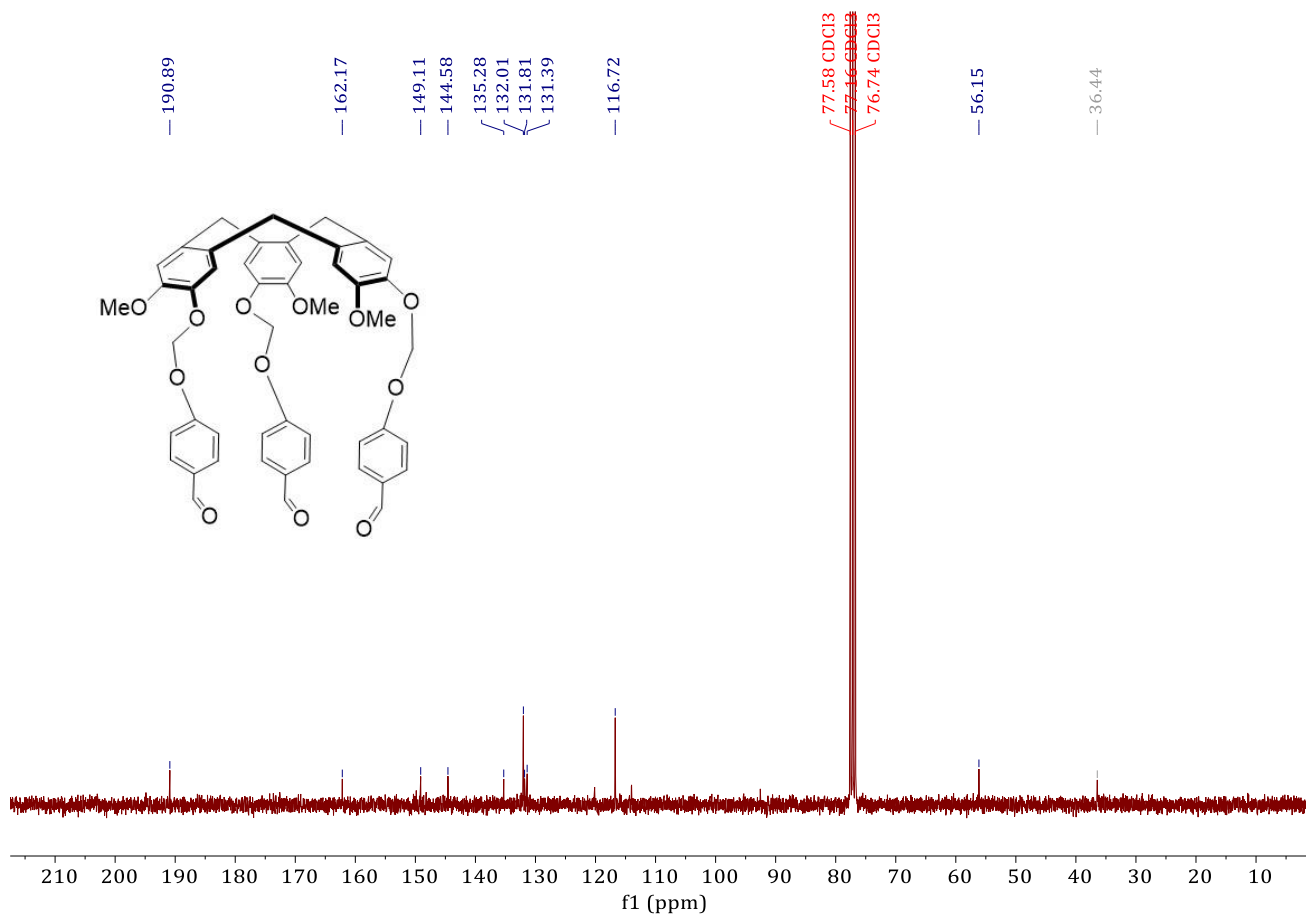

Figure S27  $^{13}\text{C}$  NMR (75 MHz,  $\text{CDCl}_3$ ) spectrum of **5**

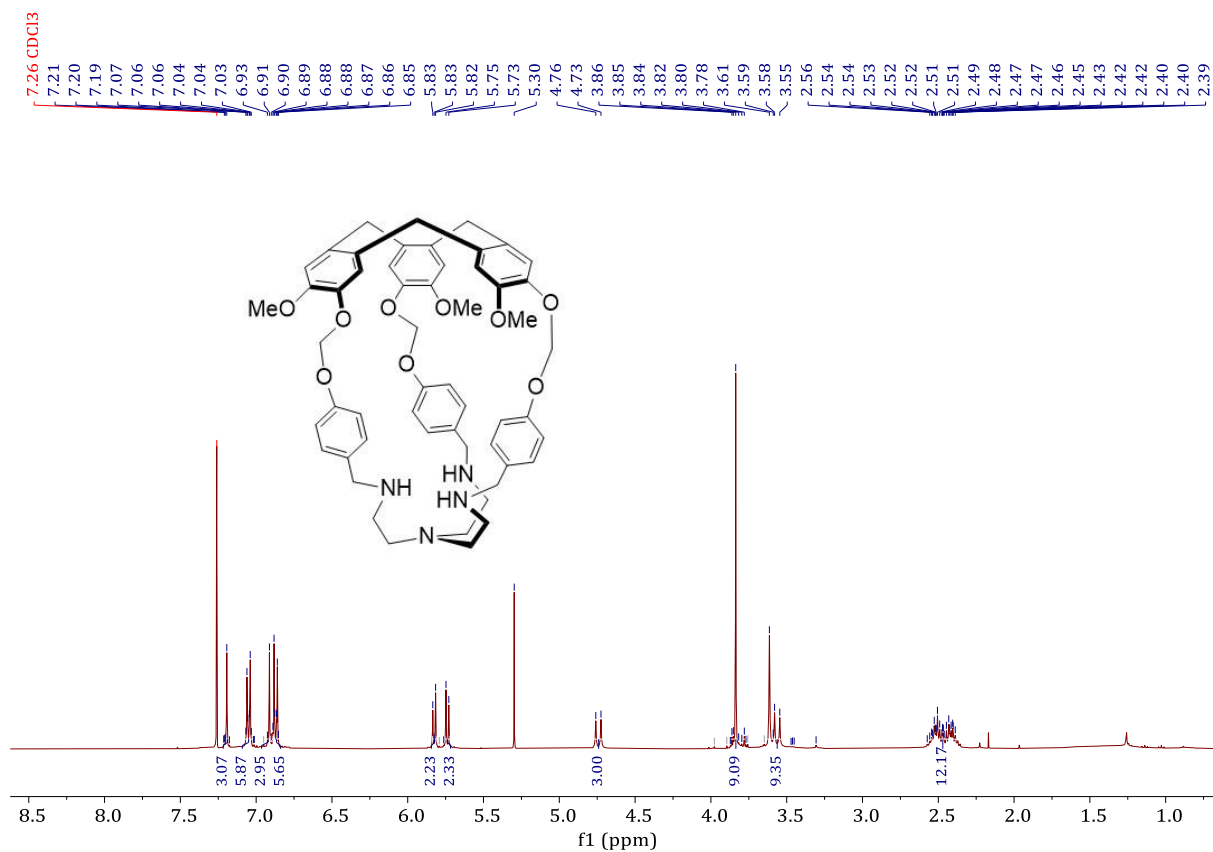

**Figure S28** <sup>1</sup>H NMR (400 MHz, CDCl<sub>3</sub>) spectrum of hemicryptophane 2



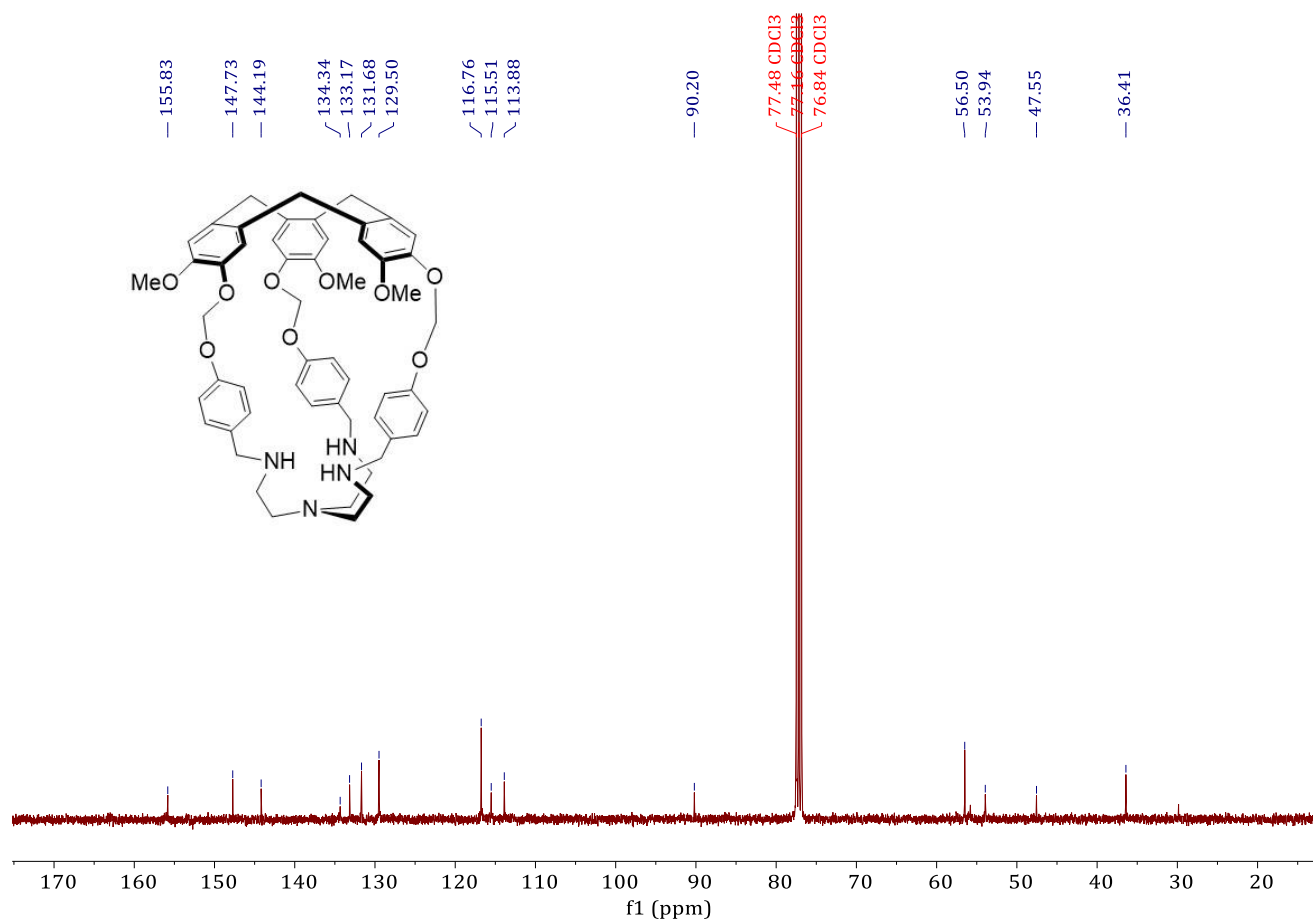

**Figure S29** <sup>13</sup>C NMR (101 MHz, CDCl<sub>3</sub>) spectrum of hemicryptophane 2

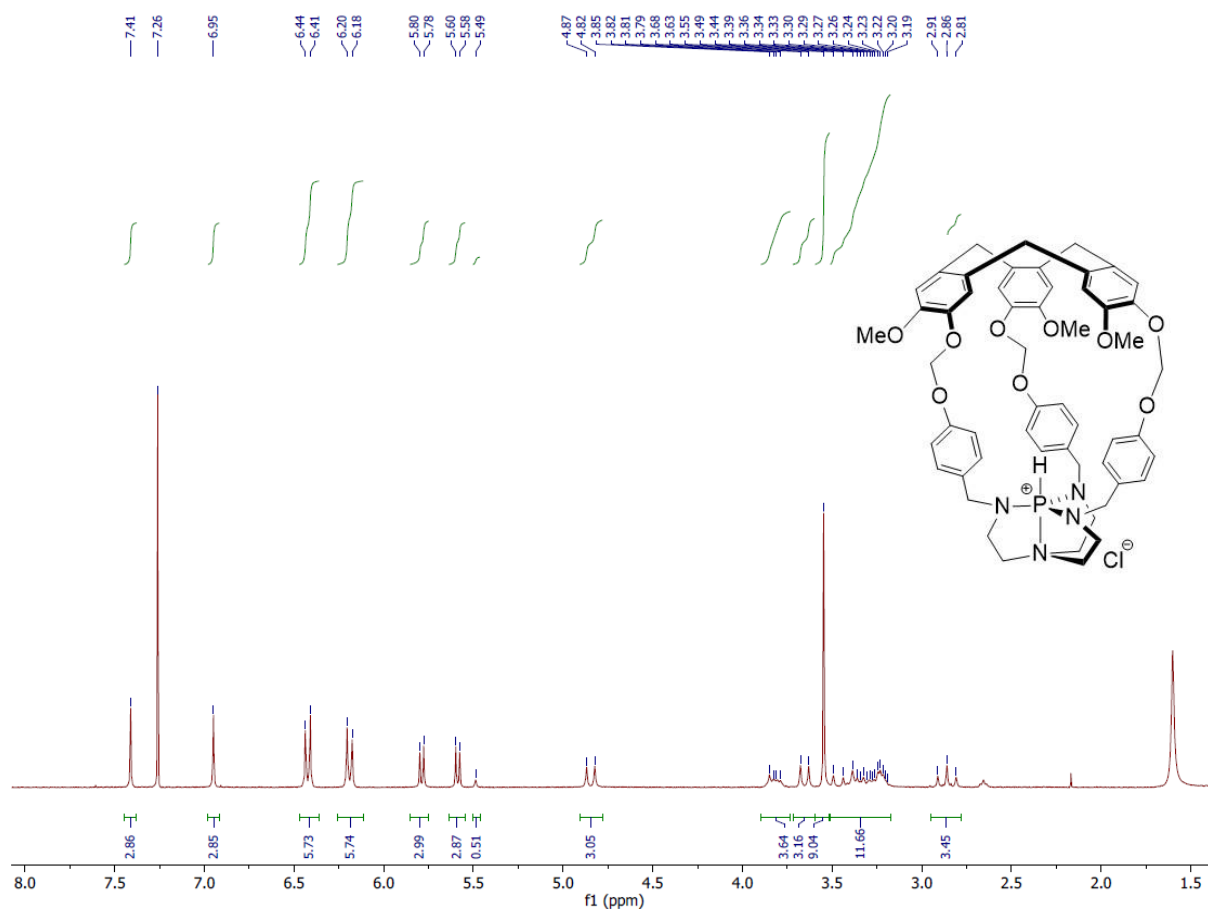

**Figure S30** <sup>1</sup>H NMR (300 MHz, CDCl<sub>3</sub>) spectrum of PH<sup>+</sup>@2

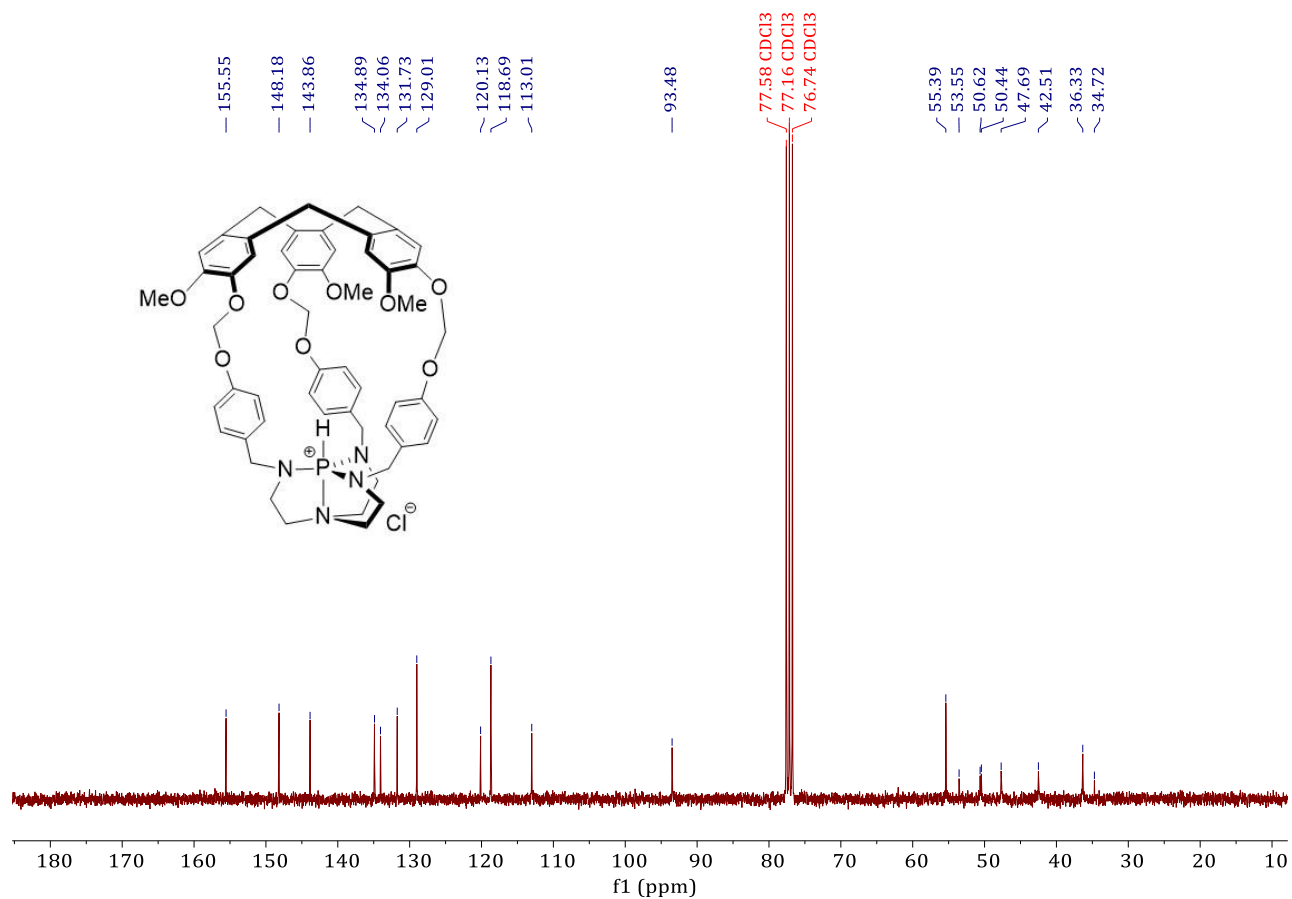

Figure S31 <sup>13</sup>C NMR (75 MHz, CDCl<sub>3</sub>) spectrum of PH<sup>+</sup>@2

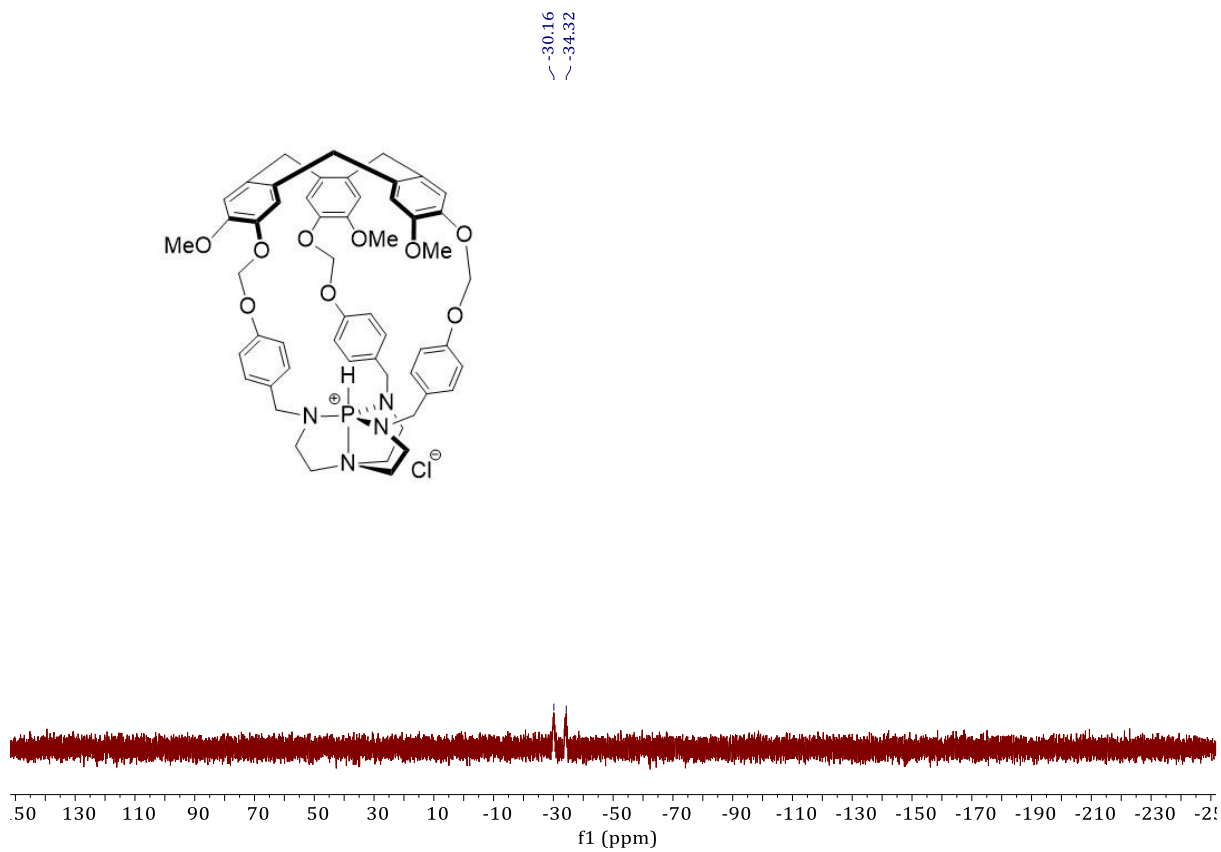

**Figure S32**  $^{31}\text{P}$  NMR (121 MHz,  $\text{CDCl}_3$ ) spectrum of  $\text{PH}^+\text{@}2$

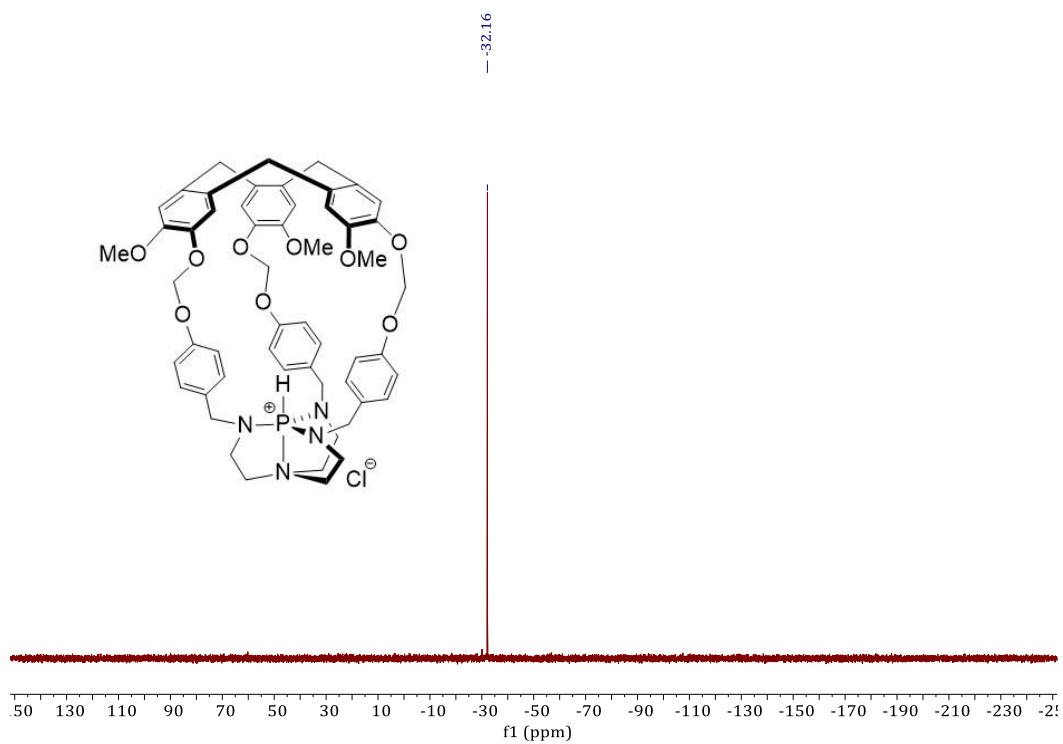

**Figure S33** <sup>31</sup>P CPD NMR (121 MHz, CDCl<sub>3</sub>) spectrum of PH<sup>+</sup>@2

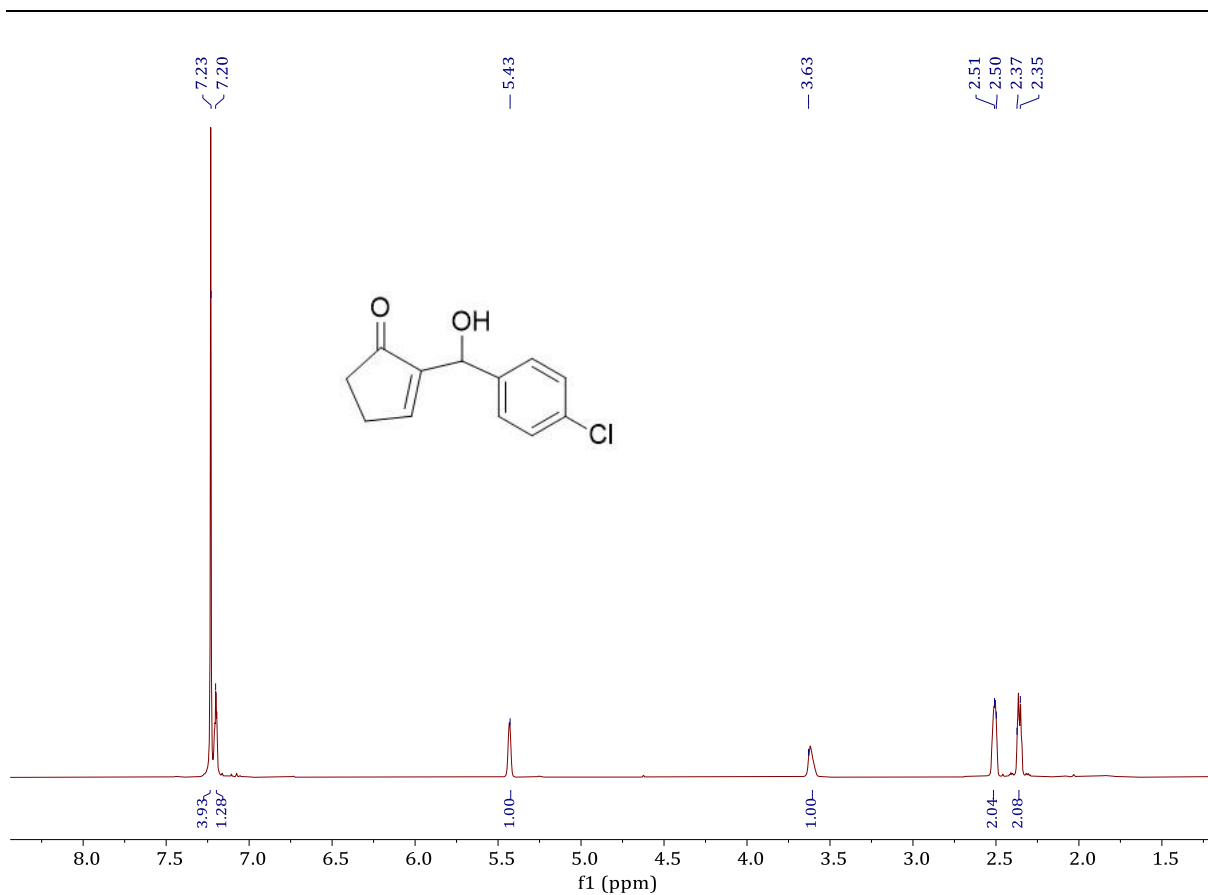

**Figure S34** <sup>1</sup>H NMR (400 MHz, CDCl<sub>3</sub>) spectrum of **2-((4-chlorophenyl)(hydroxy)methyl)cyclopent-2-en-1-one**

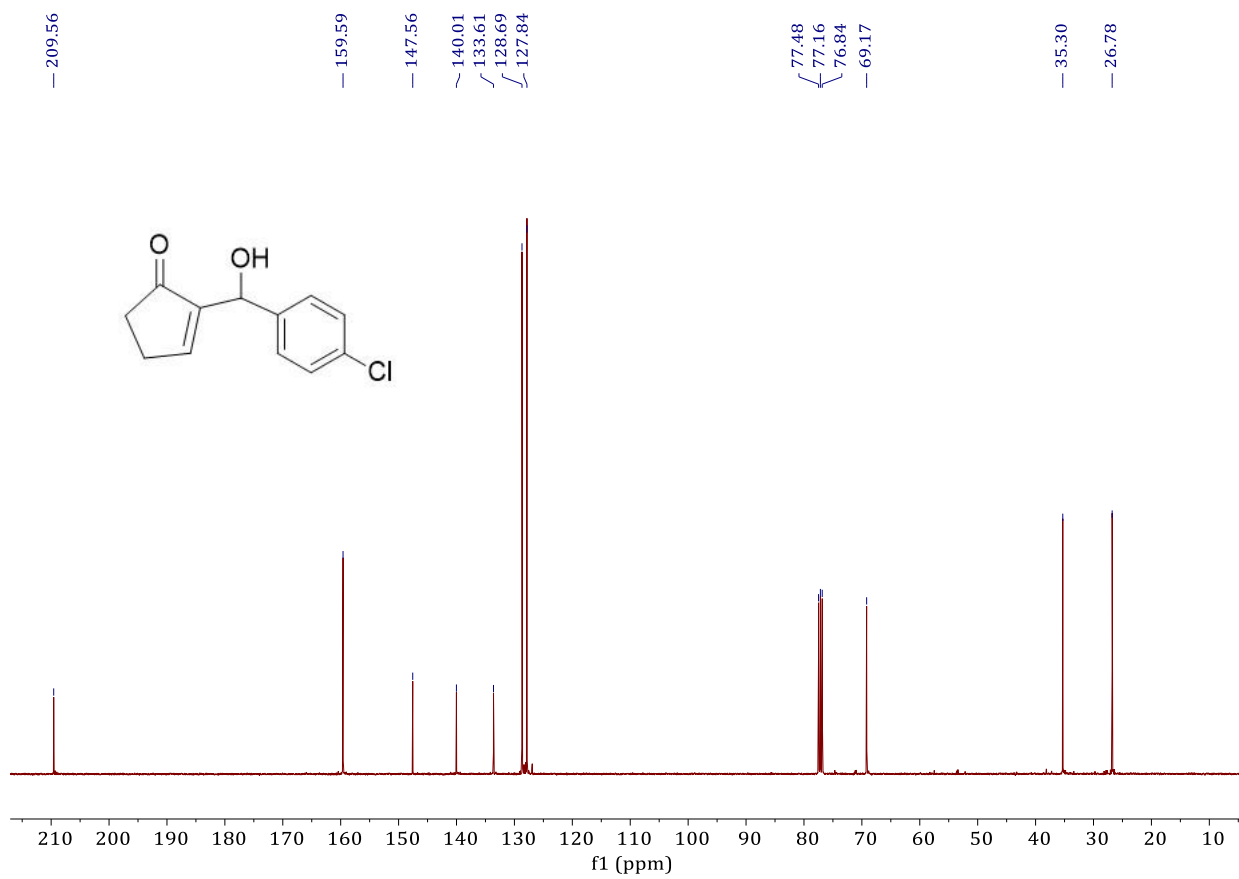

**Figure S35**  $^{13}\text{C}$  NMR (101 MHz,  $\text{CDCl}_3$ ) spectrum of **2-((4-chlorophenyl)(hydroxy)methyl)cyclopent-2-en-1-one**

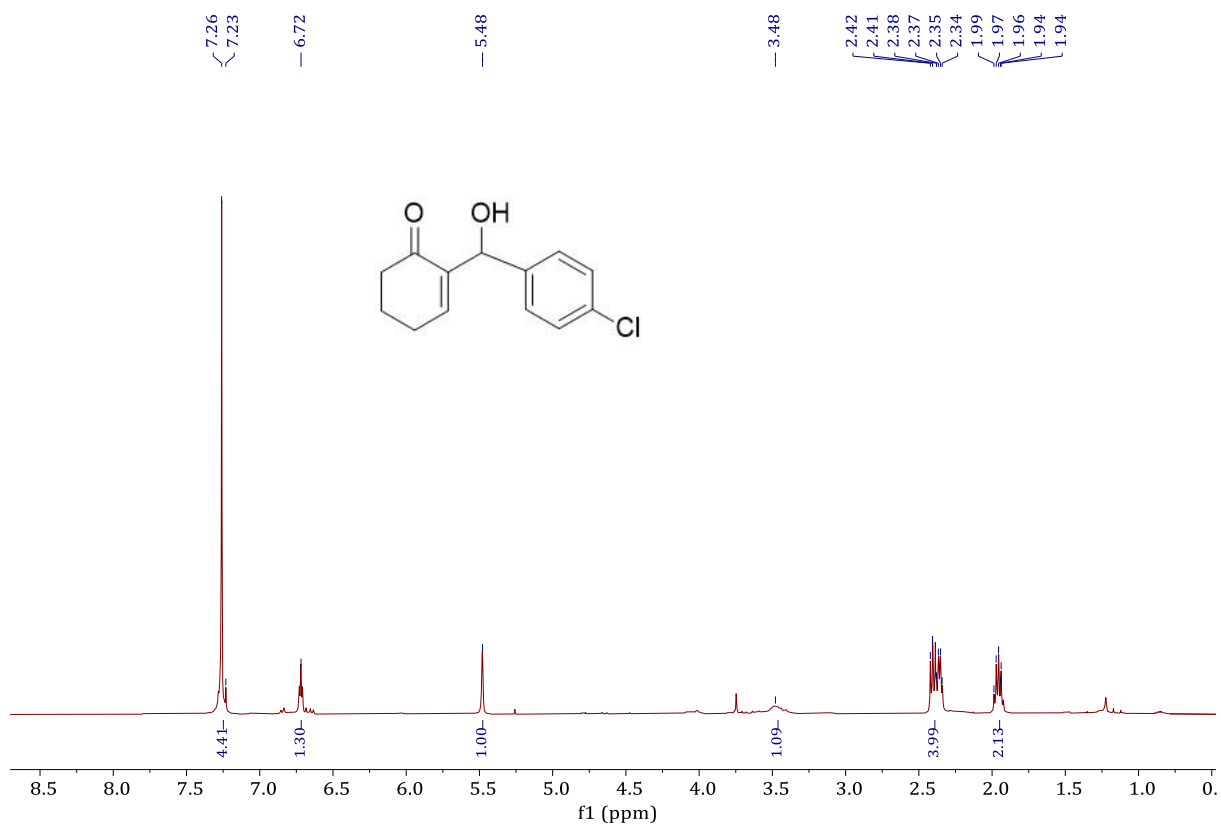

**Figure S36**  $^1\text{H}$  NMR (400 MHz,  $\text{CDCl}_3$ ) spectrum of **2-((4-chlorophenyl)(hydroxy)methyl)cyclohex-2-en-1-one**



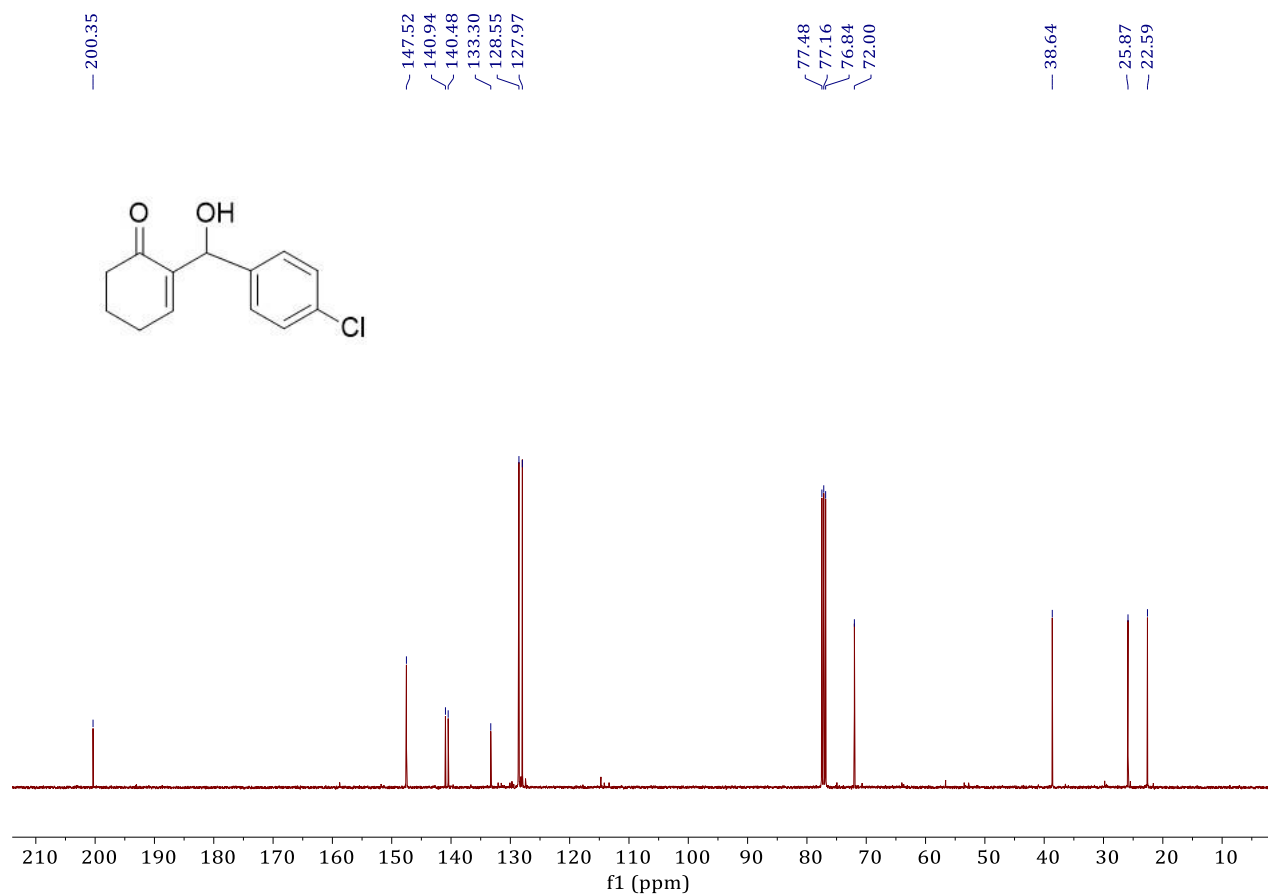

**Figure S37** <sup>13</sup>C NMR (101 MHz, CDCl<sub>3</sub>) spectrum of **2-((4-chlorophenyl)(hydroxy)methyl)cyclohex-2-en-1-one**

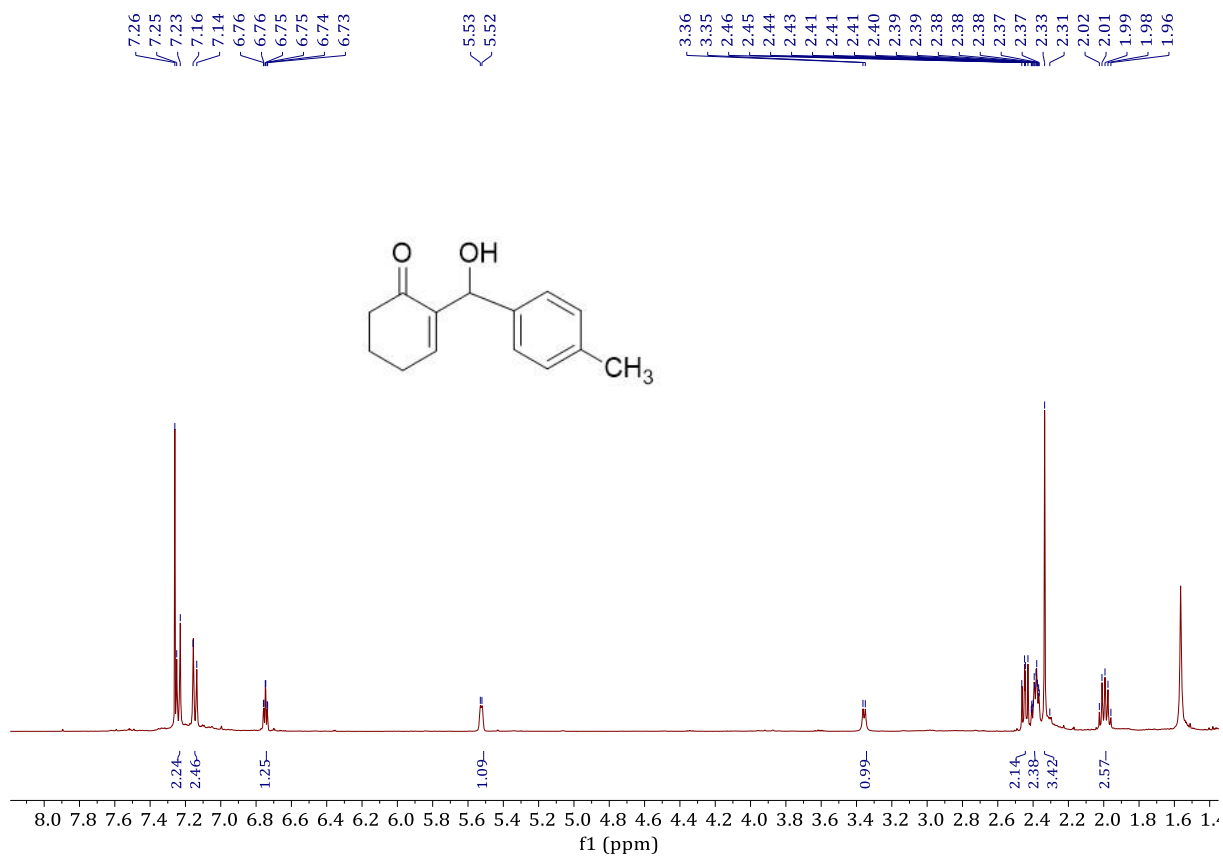

**Figure S38** <sup>1</sup>H NMR (400 MHz, CDCl<sub>3</sub>) spectrum of **2-(hydroxy(p-tolyl)methyl)cyclohex-2-en-1-one**

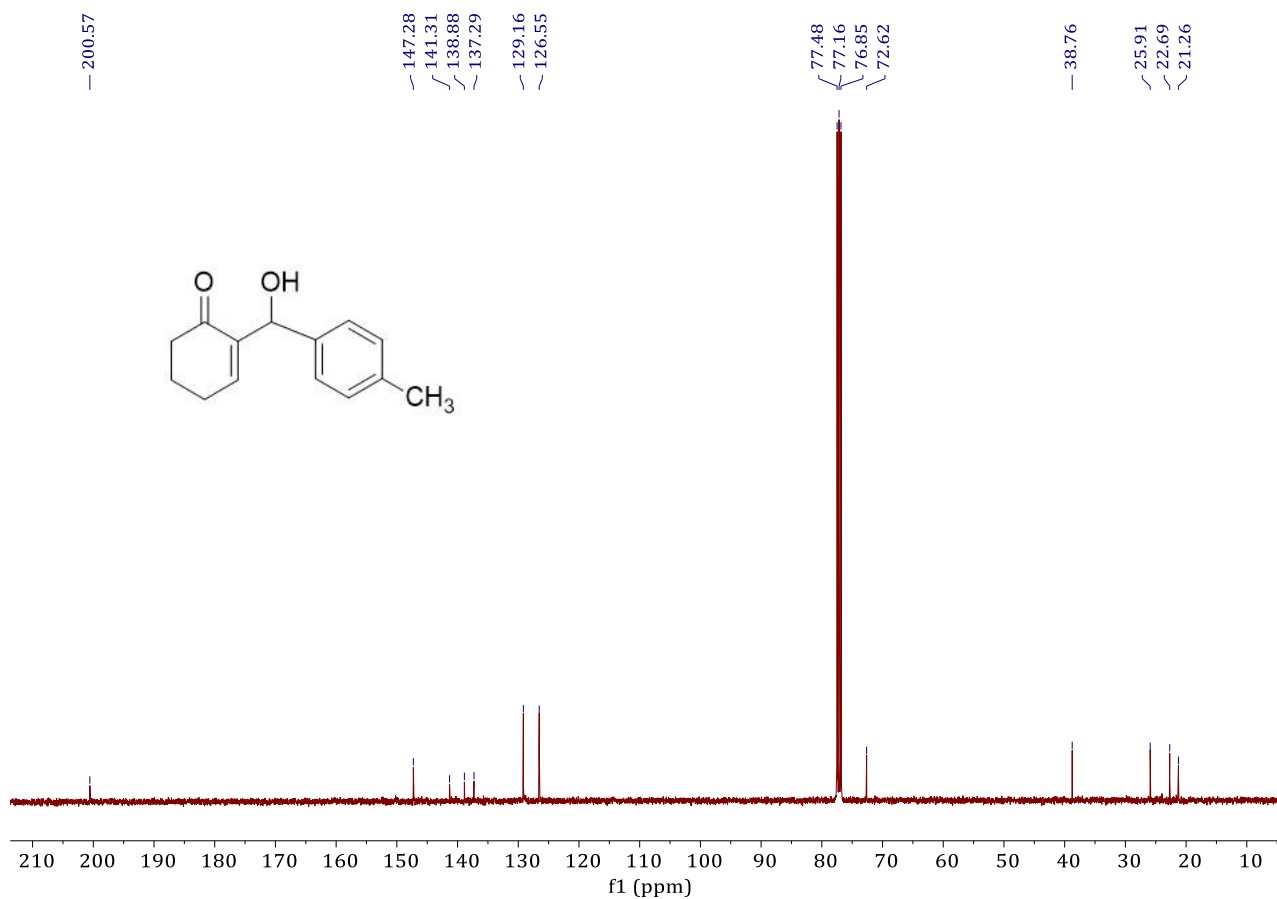

**Figure S39** <sup>13</sup>C NMR (101 MHz, CDCl<sub>3</sub>) spectrum of 2-(hydroxy(p-tolyl)methyl)cyclohex-2-en-1-one

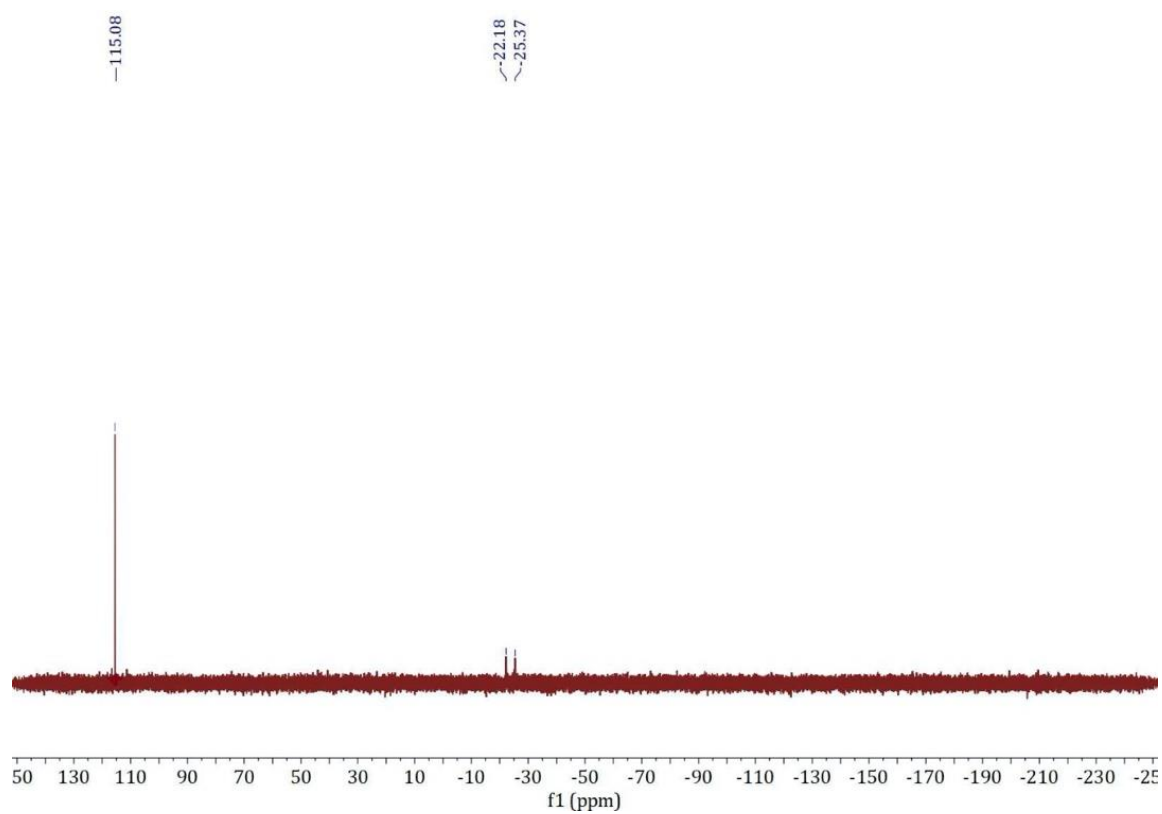

**Figure S40**  $^{31}\text{P}$  NMR (121 MHz,  $\text{CDCl}_3$ ) spectrum of P@4 with  $\text{TiCl}_4$

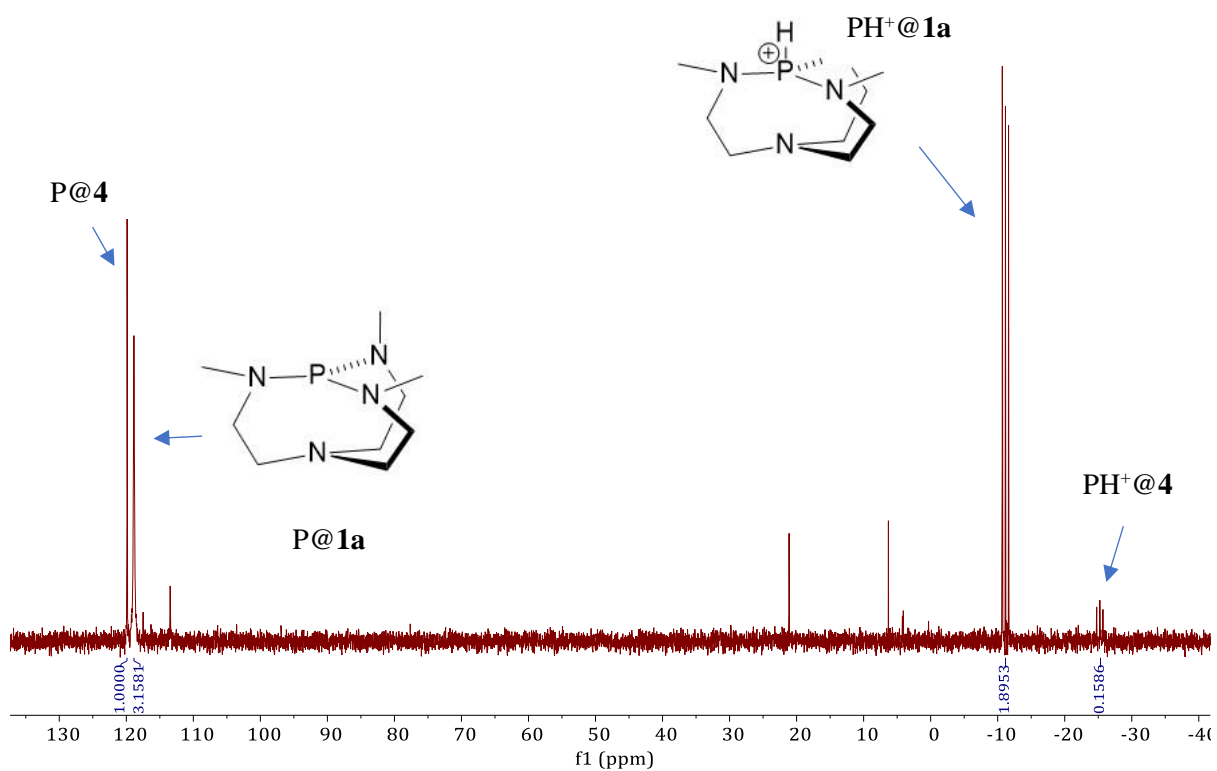

**Figure S41**  $^{31}\text{P}$  NMR (162 MHz,  $\text{CD}_3\text{CN}$ ) spectrum of competition experiment

$$\frac{K_a^{\text{PH}^+@3}}{K_a^{\text{PH}^+@1a}} = \frac{[\text{P@4}][\text{PD}^+@1a]}{[\text{PD}^+@4][\text{P@1a}]} = \frac{1 \times 1.8953}{0.1586 \times 3.1581} = 3.78$$

with  $K_a^{\text{PH}^+@1a} = 1.26 \times 10^{-33}$

$$K_a^{\text{PH}^+@4} = 4.77 \times 10^{-33}$$

---

## V / Kinetics experiment

### Rate constants of proton exchange of P@4

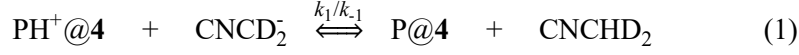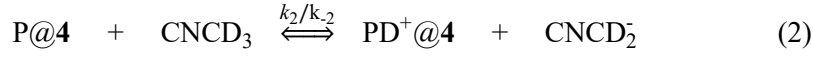

$$-\frac{d([\text{PH}^+\text{@4}])}{dt} = k_1[\text{PH}^+\text{@4}][\text{CD}_2\text{CN}^-] = +\frac{d([\text{P@4}])}{dt}$$

$$\frac{d\left(\frac{[\text{P@4}]}{[\text{PH}^+\text{@4}]}\right)}{dt} = \frac{\frac{d[\text{P@4}]}{dt}[\text{PH}^+\text{@4}] - \frac{d[\text{PH}^+\text{@4}]}{dt}[\text{P@4}]}{([\text{PH}^+\text{@4}])^2}$$

$$= k_1[\text{CD}_2\text{CN}^-] + \frac{k_1[\text{CD}_2\text{CN}^-][\text{P@4}]}{[\text{PH}^+\text{@4}]}$$

$$= k_1[\text{CD}_2\text{CN}^-]\left(1 + \frac{[\text{P@4}]}{[\text{PH}^+\text{@4}]}\right)$$

$$\text{with } [\text{CD}_2\text{CN}^-] = \frac{K_e}{K_a^{\text{PH}^+\text{@1a}}} \frac{[\text{P@1a}]}{[\text{PH}^+\text{@1a}]}$$

$$\rightarrow \frac{d\left(\frac{[\text{P@4}]}{[\text{PH}^+\text{@4}]}\right)}{dt} = \frac{k_1 K_e}{K_a^{\text{PH}^+\text{@1a}}} \times \frac{[\text{P@1a}](1 + [\text{P@4}]/[\text{PH}^+\text{@4}])}{[\text{PH}^+\text{@1a}]}$$

$$\text{and } k_{-1} = \frac{K_e k_1}{K_a^{\text{PH}^+\text{@4}}}$$

|    | t(min) | [P@4]  | [PH <sup>+</sup> @4] | [PH <sup>+</sup> @1a] | [P@1a]  | [P@4]/[PH <sup>+</sup> @4] | d([P@4]/[PH <sup>+</sup> @4])/dt | (1+[P@4]/[PH <sup>+</sup> @4]) | [PH <sup>+</sup> 1a]/[P@1a] | $k_1K_c/K_a^{PH^+@1a}$ |
|----|--------|--------|----------------------|-----------------------|---------|----------------------------|----------------------------------|--------------------------------|-----------------------------|------------------------|
| 1  | 0      | 0.8791 | 5.1547               | 3.3261                | 18.0362 | 0.170543388                | -                                | 1.170543388                    | 0.184412459                 | -                      |
| 2  | 30     | 1.0141 | 7.6105               | 5.4794                | 27.5649 | 0.133250115                | 0.000781901                      | 1.133250115                    | 0.198781784                 | 0.000137152            |
| 3  | 60     | 0.0715 | 0.3288               | 0.263                 | 1.2295  | 0.217457421                | 0.001361967                      | 1.217457421                    | 0.213908093                 | 0.000239299            |
| 4  | 90     | 0.0675 | 0.314                | 0.2787                | 1.2281  | 0.214968153                | 0.000773014                      | 1.214968153                    | 0.226935917                 | 0.000144386            |
| 5  | 120    | 0.0796 | 0.3017               | 0.2875                | 1.2192  | 0.26383825                 | 0.001394787                      | 1.26383825                     | 0.235810367                 | 0.000260243            |
| 6  | 150    | 0.0844 | 0.2826               | 0.2977                | 1.1809  | 0.298655343                | 0.001481176                      | 1.298655343                    | 0.252095859                 | 0.000287527            |
| 7  | 180    | 1.8574 | 5.2661               | 5.7805                | 23.0259 | 0.352708836                | 0.001344158                      | 1.352708836                    | 0.25104339                  | 0.000249456            |
| 8  | 210    | 1.8955 | 4.9973               | 5.8713                | 22.0822 | 0.379304825                | 0.001005577                      | 1.379304825                    | 0.265883834                 | 0.000193842            |
| 9  | 240    | 0.1045 | 0.253                | 0.3176                | 1.1688  | 0.413043478                | 0.001711783                      | 1.413043478                    | 0.271731691                 | 0.00032918             |
| 10 | 270    | 2.2723 | 4.7142               | 6.1381                | 21.9193 | 0.482011794                | 0.002335643                      | 1.482011794                    | 0.280031753                 | 0.000441329            |
| 11 | 300    | 2.2478 | 4.0634               | 5.8139                | 20.0513 | 0.553182064                | 0.001052017                      | 1.553182064                    | 0.289951275                 | 0.000196393            |
| 12 | 330    | 2.1566 | 3.9561               | 5.9179                | 19.8868 | 0.545132833                | 0.001394391                      | 1.545132833                    | 0.297579299                 | 0.000268548            |
| 13 | 360    | 2.547  | 3.9994               | 6.2663                | 20.2325 | 0.636845527                | 0.00162535                       | 1.636845527                    | 0.309714568                 | 0.00030754             |
| 14 | 390    | 2.1678 | 3.3732               | 5.6442                | 17.9871 | 0.64265386                 | 0.00125138                       | 1.64265386                     | 0.313791551                 | 0.000239048            |
| 15 | 420    | 0.151  | 0.2121               | 0.3646                | 1.1543  | 0.711928336                | 0.00142173                       | 1.711928336                    | 0.315862427                 | 0.000262319            |
| 16 | 450    | 2.3093 | 3.1723               | 5.7199                | 17.8746 | 0.727957633                | 0.001933399                      | 1.727957633                    | 0.320001566                 | 0.000358047            |
| 17 | 480    | 2.6647 | 3.2185               | 6.267                 | 18.9661 | 0.827932267                | 0.002488504                      | 1.827932267                    | 0.330431665                 | 0.000449842            |
| 18 | 510    | 0.1644 | 0.1874               | 0.3737                | 1.1224  | 0.877267876                | 0.00232931                       | 1.877267876                    | 0.332947256                 | 0.00041312             |
| 19 | 540    | 2.8723 | 2.9682               | 6.1574                | 18.2002 | 0.967690856                | 0.002008543                      | 1.967690856                    | 0.338314964                 | 0.000345339            |
| 20 | 570    | 2.8771 | 2.8835               | 6.2613                | 18.1298 | 0.997780475                | 0.001347088                      | 1.997780475                    | 0.345359574                 | 0.000232873            |
| 21 | 600    | 2.9219 | 2.7867               | 6.3152                | 18.0553 | 1.048516166                | 0.002732266                      | 2.048516166                    | 0.349769874                 | 0.000466515            |
| 22 | 630    | 3.043  | 2.6194               | 6.2539                | 17.2318 | 1.161716424                | 0.001425204                      | 2.161716424                    | 0.362927843                 | 0.000239276            |
| 23 | 660    | 2.991  | 2.6375               | 6.5362                | 18.0737 | 1.134028436                | 0.002910767                      | 2.134028436                    | 0.361641501                 | 0.000493271            |
| 24 | 690    | 3.0441 | 2.2779               | 5.9077                | 16.0721 | 1.336362439                | 0.003806461                      | 2.336362439                    | 0.367574866                 | 0.000598862            |
| 26 | 750    | 2.8877 | 2.2432               | 6.2449                | 16.8988 | 1.287312767                | 0.001059781                      | 2.287312767                    | 0.36954695                  | 0.000171222            |
| 27 | 780    | 3.0853 | 2.1636               | 6.0147                | 16.1186 | 1.426002958                | 0.003658205                      | 2.426002958                    | 0.373152755                 | 0.000562682            |
| 28 | 810    | 3.0778 | 2.0426               | 6.2022                | 15.9919 | 1.506805052                | 0.001054464                      | 2.506805052                    | 0.387833841                 | 0.000163139            |
| 29 | 840    | 2.9635 | 1.9899               | 6.3054                | 16.0508 | 1.489270818                | 0.002360166                      | 2.489270818                    | 0.392840232                 | 0.000372466            |

**Table S2** Proton transfer kinetic data between PH<sup>+</sup>@4 and P@4 (P@1a as monitor)

$$\text{Defining } X_i = \frac{k_1 K_c}{K_a^{PH^+@1a}} \quad (i=1,2,3,\dots,29.)$$

$$\text{so } \sum_{i=1}^{29} X_i = 0.008422915 \quad X = 0.00031196$$

According to

$$\frac{d\left(\frac{[P@4]}{[PH^+@4]}\right)}{dt} = \frac{k_1 K_c}{K_a^{PH^+@1a}} \times \frac{[P@1a](1+[P@4]/[PH^+@4])}{[PH^+@1a]}$$

$$\frac{k_1 K_c}{K_a^{PH^+@1a}} = \frac{X}{60} = 5.2 \times 10^{-6} \text{ L.mol}^{-1}.\text{s}^{-1}$$

---

with

$$K_e=10^{-32.2} \quad K_a^{\text{PH}^+@4}=4.77 \times 10^{-33}$$

$$k_I=1.04 \times 10^{-6} \text{ L.mol}^{-1}.\text{s}^{-1}$$

$$k_{-I}=1.37 \times 10^{-6} \text{ L.mol}^{-1}.\text{s}^{-1}$$

## VI/ Mass spectra

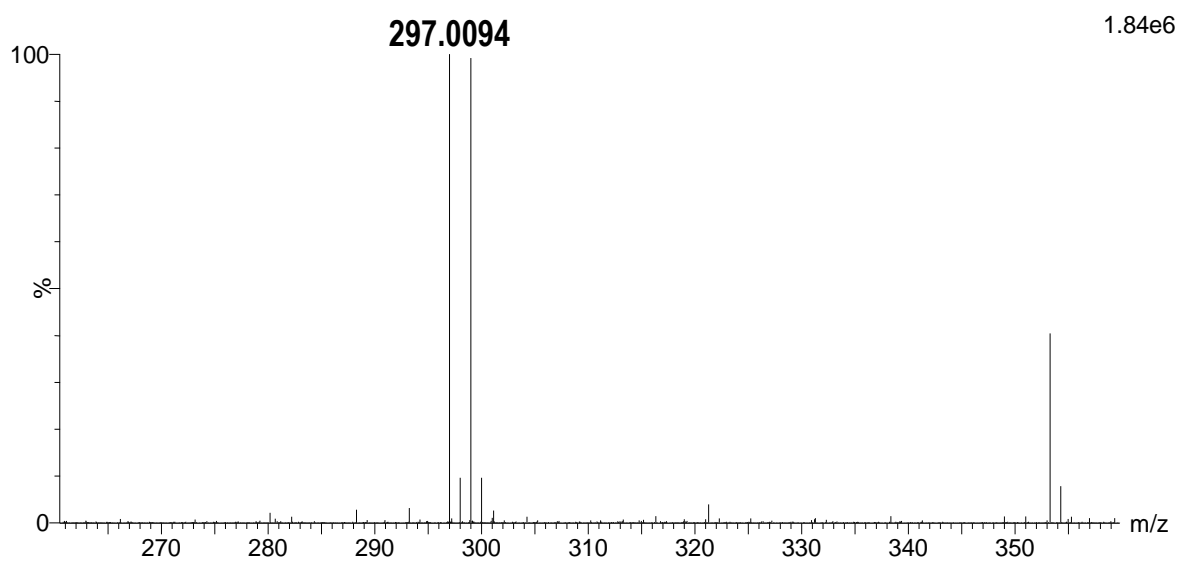

**Figure S42** Positive ESI-HRMS spectra of **8**:  $m/z$   $[M+Na]^+$  calcd for  $C_{11}H_{15}BrO_3$ , 297.0097; found at 297.0094



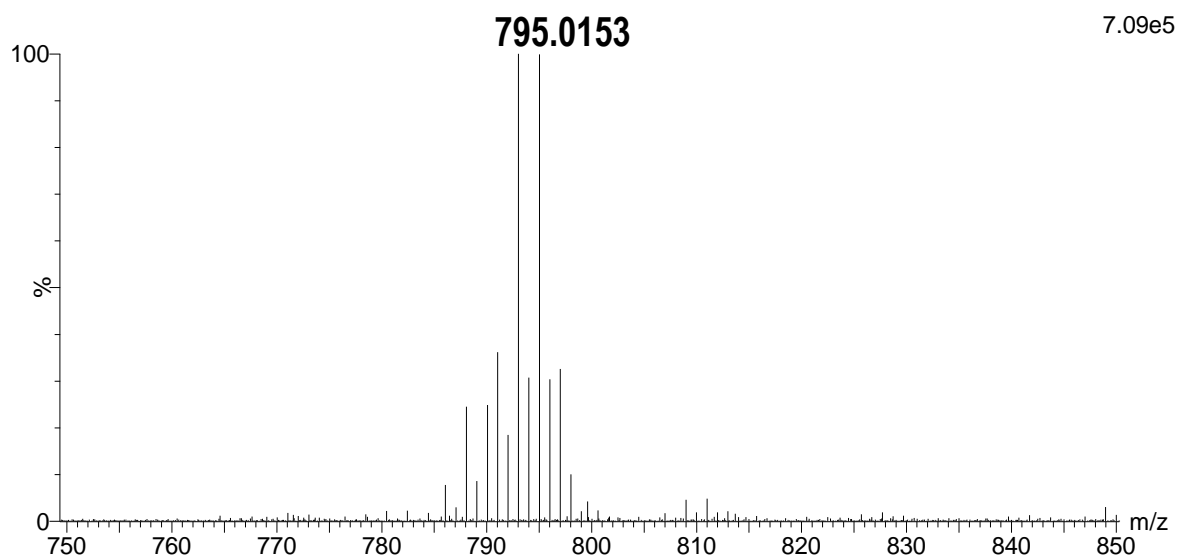

**Figure S43** Positive ESI-HRMS spectra of **9**:  $m/z$   $[M+Na]^+$  calcd for  $C_{33}H_{39}Br_3O_6$ , 795.0154; found at 795.0153

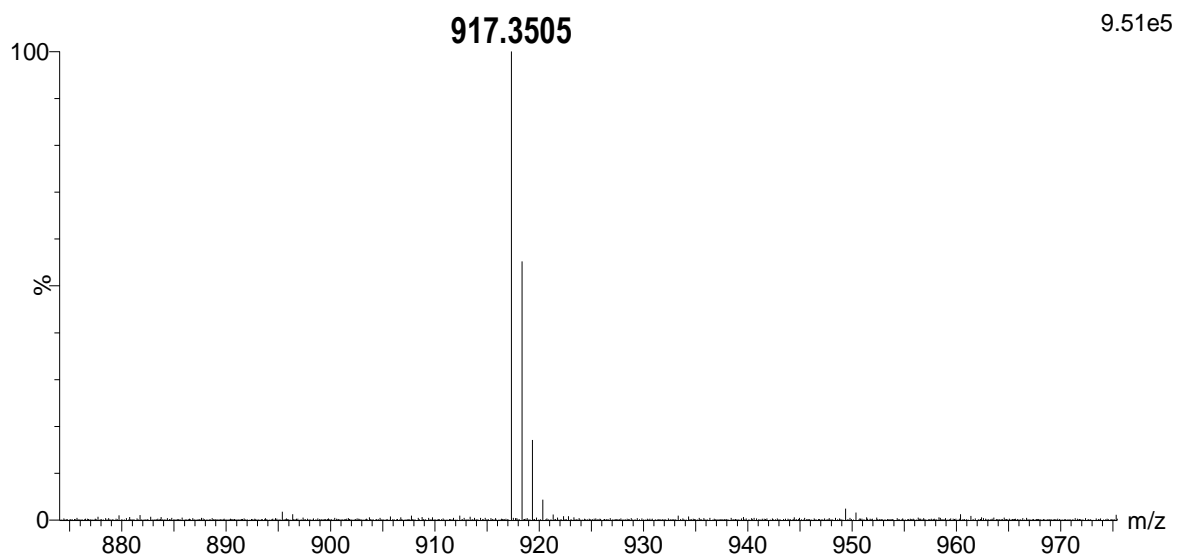

**Figure S44** Positive ESI-HRMS spectra of **7**:  $m/z$   $[M+Na]^+$  calcd for  $C_{54}H_{54}O_{12}$ , 917.3507; found at 917.3505

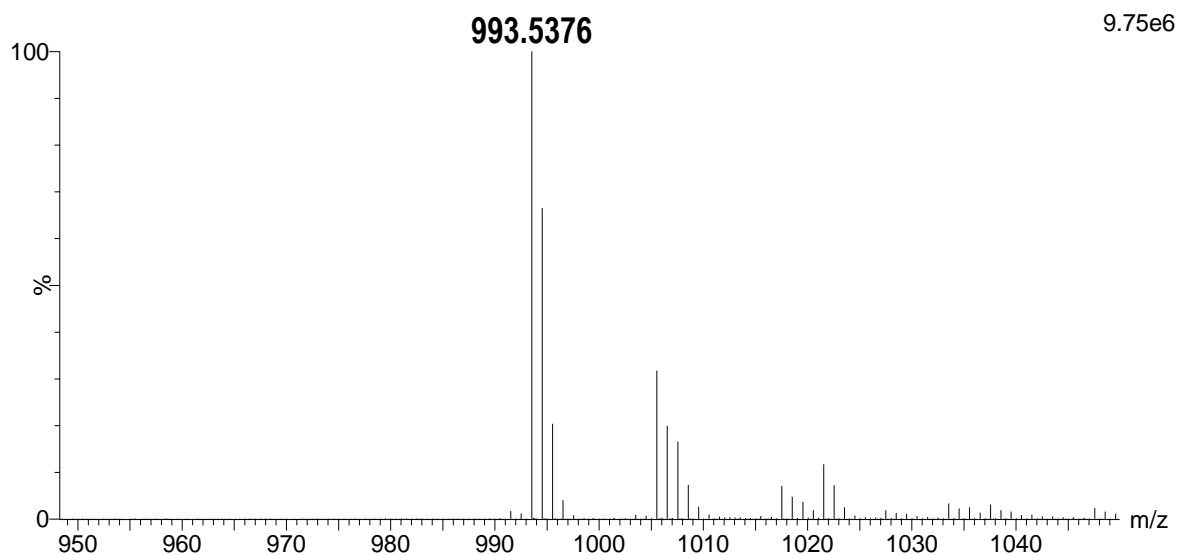

**Figure S45** Positive ESI-HRMS spectra of hemicryptophane **4**:  $m/z$   $[M+H]^+$  calcd for  $C_{60}H_{72}N_4O_9$ , 993.5372; found at 993.5376

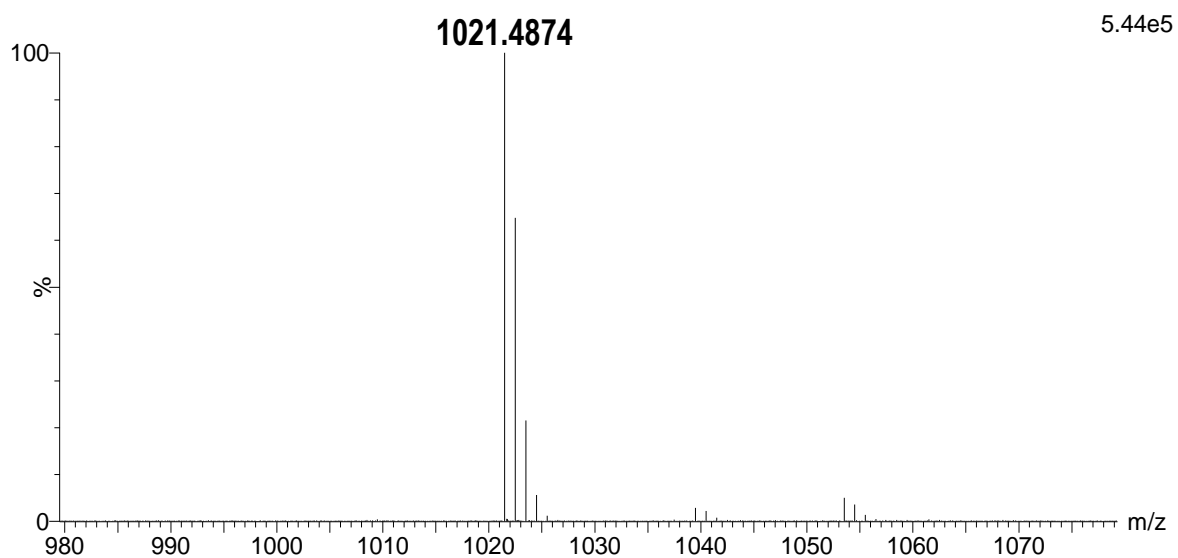

**Figure S46** Positive ESI-HRMS spectra of  $PH^+@4$ :  $m/z$   $[M]^+$  calcd for  $C_{60}H_{70}N_4O_9P^+$ , 1021.4875; found at 1021.4874

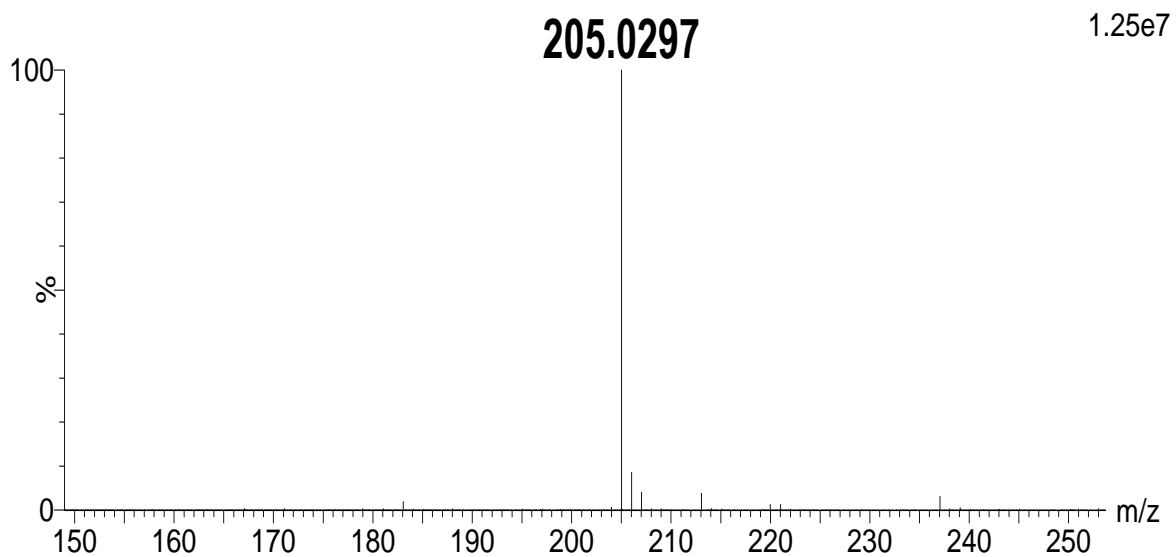

**Figure S47** Positive ESI-HRMS spectra of **10**:  $m/z$   $[M+Na]^+$  calcd for  $C_9H_{10}O_2S$ , 205.0294; found at 205.0297

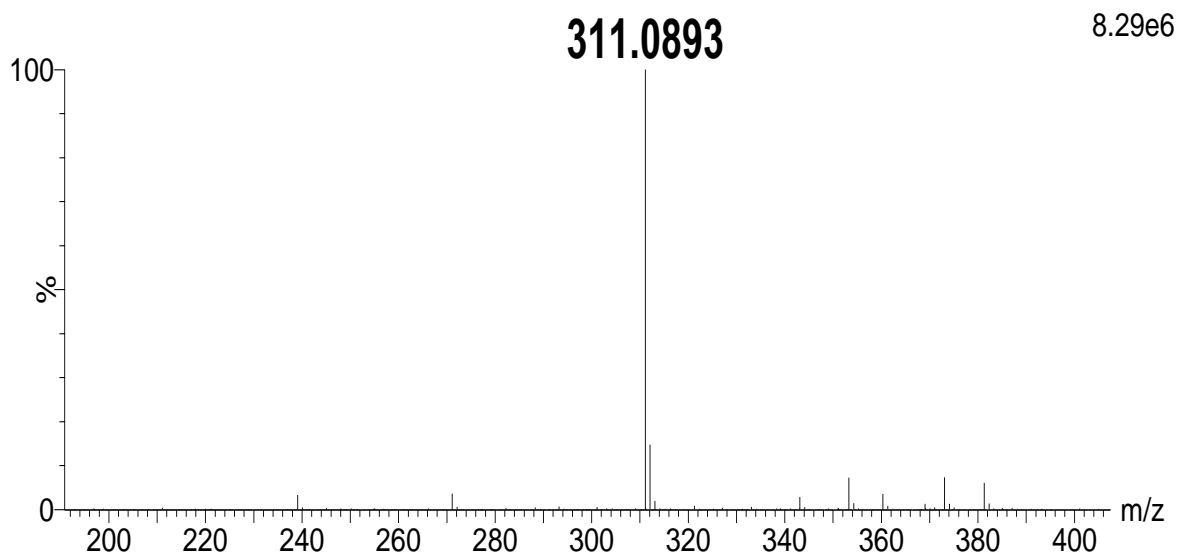

**Figure S48** Positive ESI-HRMS spectra of **12**:  $m/z$   $[M+Na]^+$  calcd for  $C_{16}H_{16}O_5$ , 311.0890; found at 311.0893

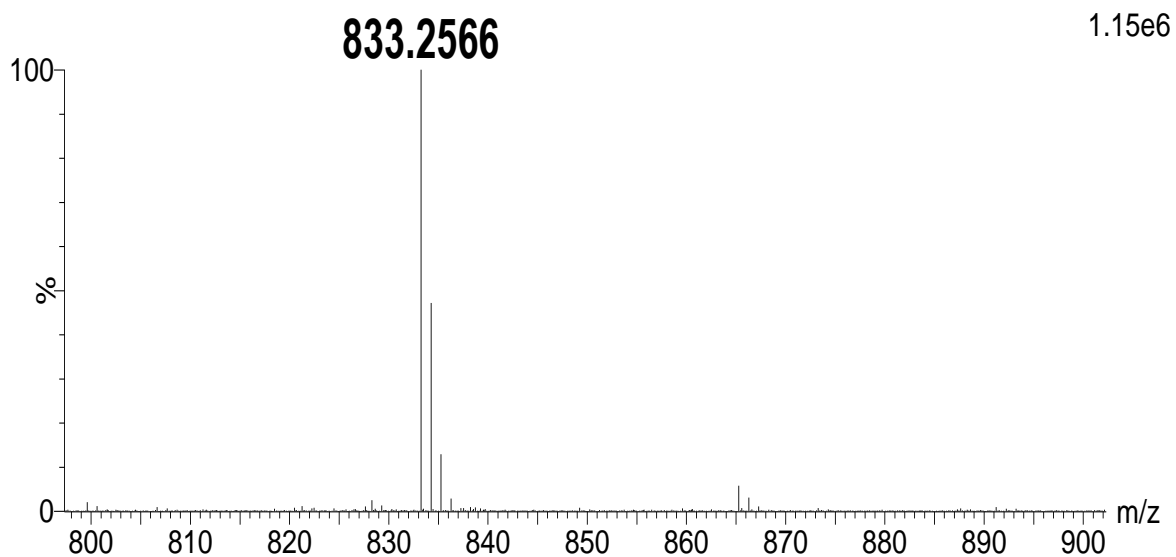

**Figure S49** Positive ESI-HRMS spectra of **5**:  $m/z$   $[M+Na]^+$  calcd for  $C_{48}H_{42}O_{12}$ , 833.2568; found at 833.2566

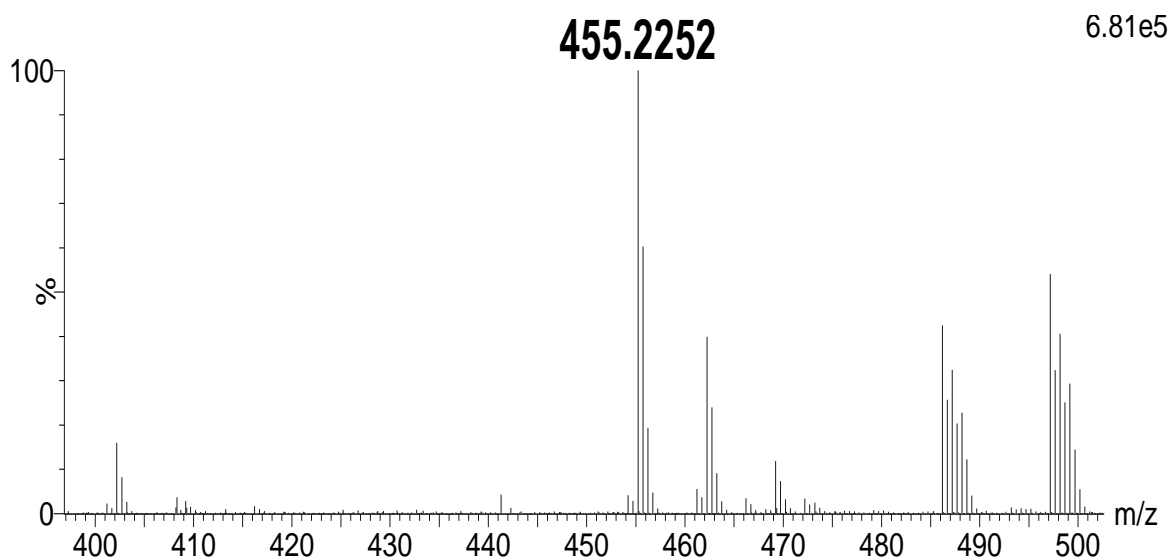

**Figure S50** Positive ESI-HRMS spectra of hemicryptophane **2**:  $m/z$   $[M+2H]^+$  calcd for  $C_{54}H_{60}N_4O_9$ , 455.2253; found at 455.2252

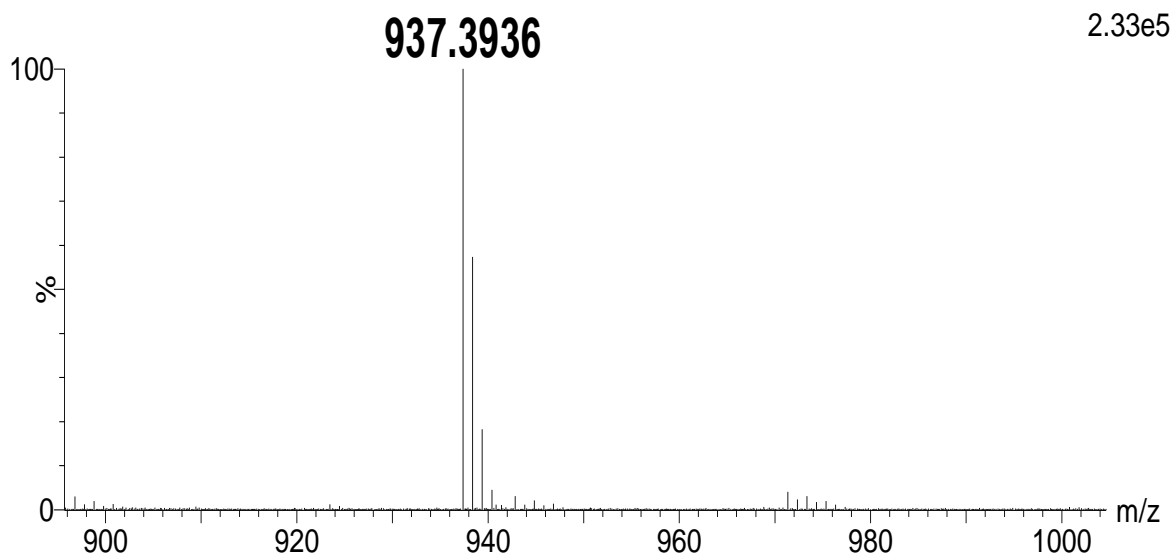

**Figure S51** Positive ESI-HRMS spectra of **PH<sup>+</sup>@2**:  $m/z$  [M+Na]<sup>+</sup> calcd for C<sub>54</sub>H<sub>58</sub>N<sub>4</sub>O<sub>9</sub>P<sup>+</sup>, 937.3936; found at 937.3936

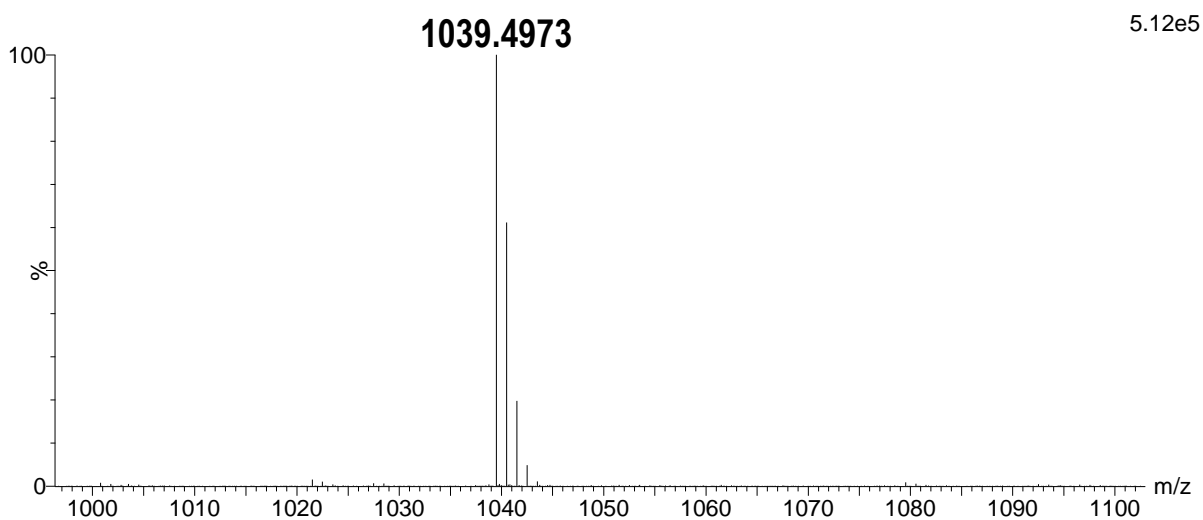

**Figure S52** Positive ESI-HRMS spectra of **13**:  $m/z$  [M+H]<sup>+</sup> calcd for C<sub>60</sub>H<sub>71</sub>N<sub>4</sub>O<sub>10</sub>P, 1039.4981; found at 1039.4973

## VII/ Crystallographic data

**Table S3** Crystallographic data for P-H<sup>+</sup>@**2** and **13**

|                                             |                                                                    |                                                                                                      |
|---------------------------------------------|--------------------------------------------------------------------|------------------------------------------------------------------------------------------------------|
| Reference                                   | P-H <sup>+</sup> @ <b>2</b> (CCDC: 2093016)                        | <b>13</b> (CCDC: 2099451)                                                                            |
| Empirical formula                           | C <sub>58</sub> H <sub>68</sub> ClN <sub>4</sub> O <sub>10</sub> P | C <sub>61</sub> H <sub>66.6</sub> Br <sub>0.6</sub> Cl <sub>3</sub> N <sub>4</sub> O <sub>10</sub> P |
| Formula weight                              | 1047.58                                                            | 1201.04                                                                                              |
| Temperature/K                               | 180.01(10)                                                         | 153.01(10)                                                                                           |
| Crystal system                              | triclinic                                                          | monoclinic                                                                                           |
| Space group                                 | P-1                                                                | P2 <sub>1</sub> /n                                                                                   |
| a/Å                                         | 10.2610(2)                                                         | 12.4213(8)                                                                                           |
| b/Å                                         | 10.87103(19)                                                       | 29.5258(19)                                                                                          |
| c/Å                                         | 26.4434(4)                                                         | 17.9736(8)                                                                                           |
| α/°                                         | 82.7150(14)                                                        | 90                                                                                                   |
| β/°                                         | 86.3036(16)                                                        | 102.414(6)                                                                                           |
| γ/°                                         | 77.2137(17)                                                        | 90                                                                                                   |
| Volume/Å <sup>3</sup>                       | 2851.32(10)                                                        | 6437.7(7)                                                                                            |
| Z                                           | 2                                                                  | 4                                                                                                    |
| ρ <sub>calc</sub> /cm <sup>3</sup>          | 1.220                                                              | 1.239                                                                                                |
| μ/mm <sup>-1</sup>                          | 1.340                                                              | 2.419                                                                                                |
| F(000)                                      | 1112.0                                                             | 2510.0                                                                                               |
| Crystal size/mm <sup>3</sup>                | 0.24 × 0.22 × 0.06                                                 | 0.16 × 0.08 × 0.04                                                                                   |
| Radiation                                   | Cu Kα (λ = 1.54184)                                                | Cu Kα (λ = 1.54184)                                                                                  |
| 2θ range for data collection/°              | 6.744 to 141.766                                                   | 5.858 to 141.642                                                                                     |
| Index ranges                                | -12 ≤ h ≤ 12, -13 ≤ k ≤ 13, -32 ≤ l ≤ 32                           | -13 ≤ h ≤ 15, -33 ≤ k ≤ 35, -21 ≤ l ≤ 20                                                             |
| Reflections collected                       | 49135                                                              | 29490                                                                                                |
| Independent reflections                     | 10867 [R <sub>int</sub> = 0.0415, R <sub>sigma</sub> = 0.0260]     | 11984 [R <sub>int</sub> = 0.0899, R <sub>sigma</sub> = 0.1362]                                       |
| Data/restraints/parameters                  | 10867/16/690                                                       | 11984/56/757                                                                                         |
| Goodness-of-fit on F <sup>2</sup>           | 1.048                                                              | 1.135                                                                                                |
| Final R indexes [I ≥ 2σ (I)]                | R <sub>1</sub> = 0.0641, wR <sub>2</sub> = 0.1779                  | R <sub>1</sub> = 0.1294, wR <sub>2</sub> = 0.2712                                                    |
| Final R indexes [all data]                  | R <sub>1</sub> = 0.0717, wR <sub>2</sub> = 0.1845                  | R <sub>1</sub> = 0.2146, wR <sub>2</sub> = 0.3175                                                    |
| Largest diff. peak/hole / e Å <sup>-3</sup> | 1.26/-0.59                                                         | 0.53/-0.41                                                                                           |
